# Supplementary material
Source: MDPI journal article supplement (https://www.mdpi.com/2071-1050/11/23/6827)
Supplement: s1 [file s1]

| CRITERIA GROUP                                                       | CRITERIA                                                                                             | Criteria weight |
|----------------------------------------------------------------------|------------------------------------------------------------------------------------------------------|-----------------|
| Infrastructural criteria group                                       | 1. Direct connection to railroad infrastructure                                                      | 3               |
|                                                                      | 2. Direct connection to highway network                                                              | 3               |
|                                                                      | 3. Safety of railroad infrastructure                                                                 | 2               |
|                                                                      | 4. Safety of road infrastructure                                                                     | 2               |
|                                                                      | 5. Maintenance of railroad infrastructure                                                            | 2               |
|                                                                      | 6. Maintenance of road infrastructure                                                                | 2               |
|                                                                      | 7. Capacity of railroad infrastructure                                                               | 3               |
|                                                                      | 8. Capacity of road infrastructure                                                                   | 3               |
|                                                                      | 9. The condition and capacity of terminal infrastructure for trucks                                  | 2               |
|                                                                      | 10. The condition and capacity of terminal infrastructure for terminal vehicles and mobile equipment | 2               |
|                                                                      | 11. Parking space capacity (in and around the port)                                                  | 3               |
|                                                                      | 12. The existence of a Terminal Operating System                                                     | 3               |
|                                                                      | 13. Appropriate port equipment for the manipulation of containers and trailers                       | 3               |
|                                                                      | 14. Appropriate sea depth                                                                            | 3               |
|                                                                      | 15. Prioritization for regular service vessels                                                       | 1               |
|                                                                      | 16. Pilotage exemption                                                                               | 1               |
|                                                                      | 17. Tug service exemption                                                                            | 1               |
| Criteria group<br>“Interaction with<br>different transport<br>modes” | 18. Number of Short Sea Shipping services                                                            | 3               |
|                                                                      | 19. Number of permanent representatives of shipping companies                                        | 3               |
|                                                                      | 20. Number of block-trains                                                                           | 3               |
|                                                                      | 21. Number of railway operators in the country                                                       | 3               |
|                                                                      | 22. Attractiveness of port services for trucks                                                       | 2               |
|                                                                      | 23. Existence of a Port Community System                                                             | 2               |
|                                                                      | 24. Prioritization of the Motorways of the Sea services                                              | 1               |

|                                            |                                                                        |   |
|--------------------------------------------|------------------------------------------------------------------------|---|
| Administrative-political<br>criteria group | 25. Motorways of the Sea service marketing                             | 3 |
|                                            | 26. Motorways of the Sea service ICT support                           | 3 |
|                                            | 27. Systematic bottleneck identification                               | 3 |
|                                            | 28. Systematic quality management of Motorways of the Sea service      | 3 |
|                                            | 29. The complexity of organization and operations                      | 2 |
|                                            | 30. The advantage of increased capacity as a result of port clustering | 1 |
|                                            | 31. Political decision-making                                          | 3 |
