# Supplementary material
Source: MDPI journal article supplement (https://www.mdpi.com/2071-1050/11/23/6827)
Supplement: s1 [file s1]

# Port of Venice

|   |                                   |                                                   |                                                            |                                                                                                                            |                                            |
|---|-----------------------------------|---------------------------------------------------|------------------------------------------------------------|----------------------------------------------------------------------------------------------------------------------------|--------------------------------------------|
| 1 | PORT<br>HINTERLAND<br>CONNECTIONS | ROAD                                              | Safety                                                     |                                                                                                                            |                                            |
|   |                                   |                                                   |                                                            | Are there clearly marked routes for accessing the terminal and leaving the terminal in order to reach the highway network? | Yes                                        |
|   |                                   |                                                   |                                                            | Is the connection between the terminal and highway network at a satisfactory safety level?                                 | Yes                                        |
|   |                                   |                                                   |                                                            | What is the level of technical characteristics of the road that access terminal?                                           | satisfactory                               |
|   |                                   |                                                   |                                                            |                                                                                                                            |                                            |
|   |                                   | RAIL                                              | Access to road<br>(Way of connection from port to highway) | Is the connection passing through the urban and inhabited area?                                                            | No                                         |
|   |                                   |                                                   |                                                            | Is there a direct access to the highway network?                                                                           | Yes                                        |
|   |                                   |                                                   | Safety                                                     | Is the signalization on a satisfactory level?                                                                              | Yes                                        |
|   |                                   |                                                   |                                                            | Are the crossings satisfactory marked?                                                                                     | Yes                                        |
|   |                                   |                                                   |                                                            | Is the railway line in full operational level                                                                              | Yes                                        |
|   |                                   |                                                   |                                                            | Is there a road and pedestrian crossing on the railway?                                                                    | Yes                                        |
|   |                                   |                                                   | Capacity                                                   | Is the current capacity of railway infrastructure satisfying?                                                              | yes                                        |
|   |                                   |                                                   |                                                            | What is the status of the railway infrastructure to the terminal with the road network?                                    | Satisfactory                               |
|   |                                   |                                                   |                                                            | Is it possible to dispatch the maximum allowed quantities of the train at once?                                            | Yes                                        |
|   |                                   |                                                   |                                                            | Is there a ramp for the loading/unloading of the trucks on the railway?                                                    | Yes                                        |
|   |                                   |                                                   |                                                            |                                                                                                                            |                                            |
|   |                                   | INLAND<br>WATERWAYS                               | Safety                                                     | Is the safety level of the port access satisfactory?                                                                       | Yes                                        |
|   |                                   |                                                   | Capacity                                                   | Is the area of the port basin sufficient?                                                                                  | For current MoS traffic only yes           |
|   |                                   |                                                   |                                                            | Is the capacity of the access to the terminal sufficient so the barges shouldn't be separated?                             | Yes                                        |
|   |                                   |                                                   | Access to road                                             | Is there a RO-RO ramp on the terminal?                                                                                     | Yes                                        |
| o | LAND-SIDE<br>TERMINAL AND<br>QUAY | INTERNAL<br>PORT ROADS                            | Wide and number of lanes                                   | Is the number of tracks on terminal roads sufficient and is their width satisfactory?                                      | Yes (for roro only)                        |
|   |                                   |                                                   | Signed post                                                | Is the terminal roads adequately marked with traffic signalization?                                                        | Yes                                        |
|   |                                   |                                                   | Lighting                                                   | Are the terminal roads satisfactorily illuminated during night time?                                                       | Yes                                        |
|   |                                   |                                                   | Road quality (maintenance)                                 | Are the terminal roads satisfactorily maintained?                                                                          | Yes                                        |
|   |                                   |                                                   | Dedicated parking area                                     | Clear identification of roads from parking area                                                                            | Yes                                        |
|   |                                   | MoS<br>TERMINAL<br>AND QUEY<br>CHARACTERIS<br>TIC | Parking signposting                                        | Parking spaces are adequately signposted for identification                                                                | Yes                                        |
|   |                                   |                                                   | Parking capacity                                           | Is the capacity of a parking lot sufficient?                                                                               | No                                         |
|   |                                   |                                                   | Parking characteristics                                    | Could the parking space accept all possible vehicle dimensions?                                                            | Yes                                        |
|   |                                   |                                                   | Terminal organization                                      | Adequately arranged, with different areas for waiting and pre-embarkation and the interior traffic areas                   | Yes (there is a limit to the waiting time) |
|   |                                   |                                                   |                                                            |                                                                                                                            |                                            |

|   |                            |                                                                                                                         |                                                        |                                                                                                                                                     |              |
|---|----------------------------|-------------------------------------------------------------------------------------------------------------------------|--------------------------------------------------------|-----------------------------------------------------------------------------------------------------------------------------------------------------|--------------|
|   |                            |                                                                                                                         | Management system                                      | Availability of computerized management system in the port (system that enables electronic exchange of documents between the drivers and terminal ) | Yes          |
|   |                            |                                                                                                                         | EXISTING auxiliary services                            | Allow for an auxiliary services area close to the vehicles                                                                                          | -            |
|   |                            | LOADING/UNLOADING ACTIVITIES AND STEVEDORING                                                                            | Guaranteed stevedoring service                         | Guaranteed stevedoring service<br>24 hours / day - 365 days / year                                                                                  | Yes          |
|   |                            |                                                                                                                         | Stevedoring flexibility                                | Guaranteed flexibility in the composition of stevedoring crews and handling equipment to absorb demand peaks in loading / unloading services        | Yes          |
|   |                            |                                                                                                                         | Cargo handling                                         | Possibility for Port Authority to license more than one cargo handling operators within the port                                                    | Yes          |
|   |                            |                                                                                                                         |                                                        |                                                                                                                                                     |              |
|   |                            | FAST ACCESS TO THE MOORING QUAY                                                                                         |                                                        | Terminal adjacent to, or close to the mooring quay                                                                                                  | Yes          |
|   |                            | TERMINAL / QUAY SECURITY                                                                                                |                                                        | Is there specific security measures related to MoS operation in accordance with ISPS Code?                                                          | Yes          |
|   |                            | SAFE VEHICLE EMBARKATION / DISEMBARKATION                                                                               |                                                        | Certified RO-RO ramp service provider                                                                                                               | -            |
|   |                            | FAST SAFETY AND SECURITY INSPECTIONS                                                                                    | Data bases of vehicles / drivers                       | Data bases of vehicles / drivers created in parallel with application of a risk management system                                                   | Yes          |
| 3 | SEA-SIDE TERMINAL AND QUAY | FAST, SAFE AND GUARANTEED SEA ACCESS OF THE TERMINAL / QUAY BY MOS VESSELS                                              |                                                        |                                                                                                                                                     |              |
|   |                            |                                                                                                                         | Existence of VTMISS                                    | Does VTMISS exists and is it in the function?                                                                                                       | Yes          |
|   |                            |                                                                                                                         | Sea-access characteristics                             | Is the depth of the access to the shore and of the very shore sufficient for the biggest MoS ships?                                                 | Yes          |
|   |                            |                                                                                                                         | Non-operational time                                   | How much time a year is the terminal out of function for bad weather?                                                                               | -            |
|   |                            | MINIMISE WAITING TIMES FOR SERVICES PROVISION TO MOS VESSELS WITHIN PORT (MOORING, TUGGING, PILOTAGE, WASTE COLLECTION) | MoS service as priority                                | Is the MoS service marked and treated as a priority in the port/terminal?                                                                           | No           |
|   |                            |                                                                                                                         | Pilotage Exemption Certificate for regular MoS ships   | Is there a liability exemption for the pilots on MoS ships that regularly access the port?                                                          | No           |
|   |                            |                                                                                                                         | Tug Obligation for regular MoS ships?                  | Is there an exemption of tug usage for MoS ships that regularly access the port?                                                                    | No           |
|   |                            |                                                                                                                         | Response time                                          | PILOT - Time required: from the request to reaction?                                                                                                | Satisfactory |
|   |                            |                                                                                                                         |                                                        | Needed hours for inspection authorities (veterinary, phytosanitary, etc.)                                                                           | Satisfactory |
|   |                            |                                                                                                                         | Coordination between service operator and MoS terminal | How would you assess the cooperation between the terminal and an agent?                                                                             | Satisfactory |
|   |                            |                                                                                                                         |                                                        | How would you assess the cooperation between the terminal and a ship?                                                                               | satisfactory |
| 4 | SHIPPING OPERATIONS        | REGULAR, RELIABLE AND                                                                                                   | Service frequency and capacity                         |                                                                                                                                                     |              |
|   |                            |                                                                                                                         |                                                        | Are the frequencies and a capacity satisfactory?                                                                                                    | Yes          |
|   |                            |                                                                                                                         | Vessel departure / arrival times                       | Are the arrival/departure tables announced?                                                                                                         | Yes          |

|   |                                        |                                                                                                                         |                                                                                                                                                   |                                                                                                   |                                      |
|---|----------------------------------------|-------------------------------------------------------------------------------------------------------------------------|---------------------------------------------------------------------------------------------------------------------------------------------------|---------------------------------------------------------------------------------------------------|--------------------------------------|
|   |                                        | CONTINUOUS SHIPPING SERVICES                                                                                            | predetermined and advertised                                                                                                                      |                                                                                                   |                                      |
|   |                                        |                                                                                                                         | No interruption allowed throughout the year                                                                                                       | Are there deviations from the tables?                                                             | -                                    |
|   |                                        | RELIABLE SHIPPING VESSELS                                                                                               | Vessel compliance with all IMO safety / security / reliability regulations                                                                        | What is the number of detention of MoS ships regarding PSC inspection in the period of last year? | (only bulk and cargo ships, no roro) |
|   |                                        |                                                                                                                         | Bow-thruster availability                                                                                                                         | Do they have adequate bow-thrusters?                                                              | Yes                                  |
|   |                                        | SAFETY OF PERSONNEL AND CARGO IN SHIPPING                                                                               | Compliance with Directives on means of securing cargo                                                                                             | Is there lack of compliance with safety regulations observed?                                     | No                                   |
|   |                                        |                                                                                                                         |                                                                                                                                                   |                                                                                                   |                                      |
| 5 | INFORMATION EXCHANGE AND DOCUMENTATION | EXCHANGE OF REAL TIME INFORMATION BETWEEN MOS SERVICE STAKEHOLDERS REGARDING DOCUMENTATION OF THE PROVIDED MOS SERVICES | AVAILABILITY OF SUITABLE ICT SYSTEM FOR REMOTE REAL TIME INFORMATION EXCHANGE (ELECTRONIC DOCUMENT TRANSFER) BETWEEN ALL MOS SERVICE STAKEHOLDERS | Is the documentation exchanged electronically?                                                    | Yes                                  |
|   |                                        |                                                                                                                         | Coordination between ports of origin and destination                                                                                              | Is there an exchange of documents between starting points and destination?                        | No                                   |
|   |                                        |                                                                                                                         | Communication of cargo documentation well in advance of ship arrival in port                                                                      | Is the documentation exchanged electronically?                                                    | Yes                                  |
|   |                                        |                                                                                                                         |                                                                                                                                                   | How do you assess electronic exchange of documents?                                               | Satisfactory                         |
|   |                                        |                                                                                                                         | Priority assignment to MoS services for procedures and dispatch                                                                                   | Is there a priority for MoS services?                                                             | No                                   |
|   |                                        |                                                                                                                         |                                                                                                                                                   |                                                                                                   |                                      |
|   |                                        | FAST CLEARING OF MOS SUBJECTS (TRANSPORT MEANS, CARGO AND PASSENGERS) FROM DOCUMENT AND PHYSICAL INSPECTIONS            | Identify regular MoS customers and certify them in advance so that they can be easily cleared (create relevant data bases)                        | Is there a regulation for acceleration and simplification of regular MoS procedures?              | No                                   |
|   |                                        |                                                                                                                         |                                                                                                                                                   | How do you assess the level of this service?                                                      | To optimize                          |
|   |                                        | STREAMLINED DOCUMENT AND PHYSICAL INSPECTIONS BY CUSTOMS                                                                | Priority assigned to MoS cargo (special queue line)                                                                                               | Is there a regulation for acceleration and simplification of regular MoS services?                | No                                   |
|   |                                        |                                                                                                                         |                                                                                                                                                   | How do you assess the level of this service?                                                      | -                                    |
|   |                                        |                                                                                                                         |                                                                                                                                                   | Is there a special infrastructure (road, parking space, inspection point, etc.) for MoS services? | Yes                                  |
|   |                                        |                                                                                                                         |                                                                                                                                                   | Do you find it useful?                                                                            | Yes                                  |

|    |                                                                     |                                                  |                                                                   |                                                                                                                            |                  |
|----|---------------------------------------------------------------------|--------------------------------------------------|-------------------------------------------------------------------|----------------------------------------------------------------------------------------------------------------------------|------------------|
|    |                                                                     | COORDINATE D CUSTOMS AND SAFETY INSPECTIONS      | Coordination of routine inspections between different authorities | Is there coordination between all inspection services in order to accelerate necessary inspections?                        | Yes              |
|    |                                                                     |                                                  |                                                                   | Is it at a satisfactory level?                                                                                             | Satisfactory     |
| 6. | MoS SERVICE PROMOTION AND IMPLEMENTATION FORM ORIGIN TO DESTINATION | PROMOTIONAL ACTIVITIES                           | Promotional centres                                               | Is the promotion conducted by the operators or the regional body?                                                          | operators        |
|    |                                                                     |                                                  |                                                                   | Is there a national/ regional body in charge of promotion? (IPC, SPC)                                                      | Yes, SPC Italy   |
|    |                                                                     |                                                  | Promotion system                                                  | How do you assess this system?                                                                                             | Not satisfactory |
|    |                                                                     |                                                  |                                                                   | How do you assess the level of promotion?                                                                                  | Satisfactory     |
|    |                                                                     |                                                  |                                                                   | How do you assess the importance of promotion for insurance of successful services?                                        | Satisfactory     |
|    |                                                                     |                                                  |                                                                   | Is the promotion conducted individually in the countries or for the complete route/service?                                | Satisfactory     |
|    |                                                                     | SUSTAINABLE AND SYSTEMATIC BOTTLENECK MANAGEMENT |                                                                   | Is there a systematic identification of bottlenecks?                                                                       | Yes              |
|    |                                                                     |                                                  |                                                                   | Are all responsible bodies in the countries that use the service included? (Ministry, port authorities, Police, Customs..) | Yes              |
|    |                                                                     |                                                  |                                                                   | Are all subjects in the transport chain called for the identification?                                                     | Yes              |
|    |                                                                     |                                                  |                                                                   | How do you assess the success of this model?                                                                               | Not satisfactory |
|    |                                                                     | ICT SUPPORT                                      | Route plan                                                        | Is there a service database on the whole route?                                                                            | No               |
|    |                                                                     |                                                  |                                                                   | Is the update of the base satisfactory?                                                                                    | No               |
|    |                                                                     |                                                  | Promotion of intermodality                                        | How do you assess usefulness of this tool?                                                                                 | Not satisfactory |
|    |                                                                     |                                                  | Electronic data interchange                                       | Is the exchange of documents on the whole route/service including the road assured?                                        | No               |
|    |                                                                     |                                                  |                                                                   | How do you assess usefulness of this service?                                                                              | Not satisfactory |
|    |                                                                     | QUALITY MANAGEMENT                               |                                                                   | Is there a system for assessment of the level of service quality from the starting point to destination?                   | No               |
|    |                                                                     |                                                  |                                                                   |                                                                                                                            |                  |
| 7. | ECOLOGICAL ASPECT                                                   | GENERAL                                          |                                                                   | Are there complaints for environmental pollution related to MoS services?                                                  | Yes              |
|    |                                                                     |                                                  |                                                                   | Is the functioning of MoS service resulting in significant environmental pollution (air, sea, land)?                       | No               |
|    |                                                                     | PORT                                             | WASTE MANAGEMENT                                                  | Is there a system for waste, sewage and bilge disposal in the harbour?                                                     | Yes              |

### Bottlenecks and missing links

#### Organisational:

- no liability exemption for the pilots on MoS ships that regularly access the port
- MoS services are not identified as priority thus
- need for additional procedures in order to accelerate and simplify procedures and work on terminal
- need for additional procedures in order to accelerate and simplify customs procedures

#### Additional services:

- non-existence of joint systematic promotion
- non-existence of IT route planner
- partial Quality Management implemented
- Ecology – some incidents have been registered

## Port of Trieste

|   |                             |      |        |                                                                                                                            |           |
|---|-----------------------------|------|--------|----------------------------------------------------------------------------------------------------------------------------|-----------|
| 1 | PORT HINTERLAND CONNECTIONS | ROAD | Safety |                                                                                                                            |           |
|   |                             |      |        | Are there clearly marked routes for accessing the terminal and leaving the terminal in order to reach the highway network? | Excellent |

|   |                             |                                       |                                                            |                                                                                                                                                     |                                                                                                |
|---|-----------------------------|---------------------------------------|------------------------------------------------------------|-----------------------------------------------------------------------------------------------------------------------------------------------------|------------------------------------------------------------------------------------------------|
|   |                             |                                       |                                                            | Is the connection between the terminal and highway network at a satisfactory safety level?                                                          | Satisfactory                                                                                   |
|   |                             |                                       |                                                            | What is the level of technical characteristics of the road that access terminal?                                                                    | Excellent                                                                                      |
|   |                             |                                       |                                                            |                                                                                                                                                     |                                                                                                |
|   |                             |                                       | Access to road<br>(Way of connection from port to highway) | Is the connection passing through the urban and inhabited area?                                                                                     | No answer                                                                                      |
|   |                             |                                       |                                                            | Is there a direct access to the highway network?                                                                                                    | Yes                                                                                            |
|   |                             |                                       |                                                            |                                                                                                                                                     |                                                                                                |
|   |                             | RAIL                                  | Safety                                                     | Is the signalization on a satisfactory level?                                                                                                       | Very satisfactory                                                                              |
|   |                             |                                       |                                                            | Are the crossings satisfactory marked?                                                                                                              | Satisfactory                                                                                   |
|   |                             |                                       |                                                            | Is the railway line in full operational level                                                                                                       | Satisfactory                                                                                   |
|   |                             |                                       |                                                            | Is there a road and pedestrian crossing on the railway?                                                                                             | No                                                                                             |
|   |                             |                                       | Capacity                                                   | Is the current capacity of railway infrastructure satisfying?                                                                                       | not entirely                                                                                   |
|   |                             |                                       |                                                            | What is the status of the railway infrastructure to the terminal with the road network?                                                             | Satisfactory, but some crossings are solved by a bridge, tunnel etc.,                          |
|   |                             |                                       |                                                            | Is it possible to dispatch the maximum allowed quantities of the train at once?                                                                     | No                                                                                             |
|   |                             |                                       |                                                            | Is there a ramp for the loading/unloading of the trucks on the railway?                                                                             | Yes                                                                                            |
|   |                             |                                       |                                                            |                                                                                                                                                     |                                                                                                |
|   |                             |                                       | INLAND WATERWAYS                                           | Safety                                                                                                                                              | Is the safety level of the port access satisfactory?                                           |
|   |                             |                                       |                                                            | Capacity                                                                                                                                            | Is the area of the port basin sufficient?                                                      |
|   |                             |                                       |                                                            |                                                                                                                                                     | Is the capacity of the access to the terminal sufficient so the barges shouldn't be separated? |
|   |                             |                                       |                                                            | Access to road                                                                                                                                      | Is there a RO-RO ramp on the terminal?                                                         |
| o | LAND-SIDE TERMINAL AND QUAY | INTERNAL PORT ROADS                   | Wide and number of lanes                                   | Is the number of tracks on terminal roads sufficient and is their width satisfactory?                                                               | No                                                                                             |
|   |                             |                                       | Signed post                                                | Is the terminal roads adequately marked with traffic signalization?                                                                                 | No                                                                                             |
|   |                             |                                       | Lighting                                                   | Are the terminal roads satisfactorily illuminated during night time?                                                                                | No answer                                                                                      |
|   |                             |                                       | Road quality (maintanance)                                 | Are the terminal roads satisfactorily maintained?                                                                                                   | No                                                                                             |
|   |                             |                                       | Dedicated parking area                                     | Clear identification of roads from parking area                                                                                                     | Yes                                                                                            |
|   |                             | MoS TERMINAL AND QUEY CHARACTERIS TIC | Parking signposting                                        | Parking spaces are adequately signposted for identification                                                                                         | Excellent                                                                                      |
|   |                             |                                       | Parking capacity                                           | Is the capacity of a parking lot sufficient?                                                                                                        | Excellent                                                                                      |
|   |                             |                                       | Parking characteristics                                    | Could the parking space accept all possible vehicle dimensions?                                                                                     | Satisfactory                                                                                   |
|   |                             |                                       | Terminal organization                                      | Adequately arranged, with different areas for waiting and pre-embarkation and the interior traffic areas                                            | Yes                                                                                            |
|   |                             |                                       | Management system                                          | Availability of computerized management system in the port (system that enables electronic exchange of documents between the drivers and terminal ) | Poor respectively                                                                              |
|   |                             |                                       | EXISTING auxiliary services                                | Allow for an auxiliary services area close to the vehicles                                                                                          | No                                                                                             |
|   |                             | LOADING/UN LOADIG ACTIVITIES          | Guaranteed stevedoring service                             | Guaranteed stevedoring service 24 hours / day - 365 days / year                                                                                     | Yes                                                                                            |

|   |                            |                                                                                                                         |                                                               |                                                                                                                                              |                                          |
|---|----------------------------|-------------------------------------------------------------------------------------------------------------------------|---------------------------------------------------------------|----------------------------------------------------------------------------------------------------------------------------------------------|------------------------------------------|
|   |                            | AND STEVEDERING                                                                                                         | Stevedoring flexibility                                       | Guaranteed flexibility in the composition of stevedoring crews and handling equipment to absorb demand peaks in loading / unloading services | No                                       |
|   |                            |                                                                                                                         | Cargo handling                                                | Possibility for Port Authority to license more than one cargo handling operators within the port                                             | Yes                                      |
|   |                            |                                                                                                                         |                                                               |                                                                                                                                              |                                          |
|   |                            | FAST ACCESS TO THE MOORING QUAY                                                                                         |                                                               | Terminal adjacent to, or close to the mooring quay                                                                                           | Yes                                      |
|   |                            | TERMINAL / QUAY SECURITY                                                                                                |                                                               | Is there specific security measures related to MoS operation in accordance with ISPS Code?                                                   | Yes                                      |
|   |                            | SAFE VEHICLE EMBARKATION / DISEMBARKATION                                                                               |                                                               | Certified RO-RO ramp service provider                                                                                                        | No                                       |
|   |                            | FAST SAFETY AND SECURITY INSPECTIONS                                                                                    | Data bases of vehicles / drivers                              | Data bases of vehicles / drivers created in parallel with application of a risk management system                                            | No                                       |
| 3 | SEA-SIDE TERMINAL AND QUAY |                                                                                                                         |                                                               |                                                                                                                                              |                                          |
|   |                            | FAST, SAFE AND GUARANTEED SEA ACCESS OF THE TERMINAL / QUAY BY MOS VESSELS                                              | Existence of VTMISS                                           | Does VTMISS exists and is it in the function?                                                                                                | Partially under governmental authorities |
|   |                            |                                                                                                                         | Sea-access characteristics                                    | Is the depth of the access to the shore and of the very shore sufficient for the biggest MoS ships?                                          | More than 12 meters                      |
|   |                            |                                                                                                                         | Non-operational time                                          | How much time a year is the terminal out of function for bad weather?                                                                        | from 10 to 2 days                        |
|   |                            | MINIMISE WAITING TIMES FOR SERVICES PROVISION TO MOS VESSELS WITHIN PORT (MOORING, TUGGING, PILOTAGE, WASTE COLLECTION) | MoS service as priority                                       | Is the MoS service marked and treated as a priority in the port/terminal?                                                                    | Yes                                      |
|   |                            |                                                                                                                         | Pilotage Exemption Certificate for regular MoS ships          | Is there a liability exemption for the pilots on MoS ships that regularly access the port?                                                   | No                                       |
|   |                            |                                                                                                                         | Tug Obligation for regular MoS ships?                         | Is there an exemption of tug usage for MoS ships that regularly access the port?                                                             | No                                       |
|   |                            |                                                                                                                         | Response time                                                 | PILOT - Time required: from the request to reaction?                                                                                         | No                                       |
|   |                            |                                                                                                                         |                                                               | Needed hours for inspection authorities (veterinary, phitosanitary, etc.)                                                                    | No answer                                |
|   |                            |                                                                                                                         | Coordination between service operator and MoS terminal        | How would you assess the cooperation between the terminal and an agent?                                                                      | Satisfactory                             |
|   |                            |                                                                                                                         |                                                               | How would you assess the cooperation between the terminal and a ship?                                                                        | Satisfactory                             |
|   |                            |                                                                                                                         |                                                               |                                                                                                                                              |                                          |
| 4 | SHIPPING OPERATIONS        | REGULAR, RELIABLE AND CONTINUOUS SHIPPING SERVICES                                                                      | Service frequency and capacity                                | Are the frequencies and a capacity satisfactory?                                                                                             | Yes                                      |
|   |                            |                                                                                                                         | Vessel departure / arrival times predetermined and advertised | Are the arrival/departure tables announced?                                                                                                  | Yes                                      |
|   |                            |                                                                                                                         | No interruption allowed throughout the year                   | Are there deviations from the tables?                                                                                                        | No answer                                |
|   |                            |                                                                                                                         |                                                               |                                                                                                                                              |                                          |
|   |                            | RELIABLE SHIPPING VESSELS                                                                                               | Vessel compliance with all IMO safety / security /            | What is the number of detention of MoS ships regarding PSC inspection in the period of last year?                                            | No answer                                |

|    |                                         |                                                                                                                         |                                                                                                                                                   |                                                                                                     |                               |
|----|-----------------------------------------|-------------------------------------------------------------------------------------------------------------------------|---------------------------------------------------------------------------------------------------------------------------------------------------|-----------------------------------------------------------------------------------------------------|-------------------------------|
|    |                                         |                                                                                                                         | reliability regulations                                                                                                                           |                                                                                                     |                               |
|    |                                         |                                                                                                                         |                                                                                                                                                   |                                                                                                     |                               |
|    |                                         |                                                                                                                         | Bow-thruster availability                                                                                                                         | Do they have adequate bow-thrusters?                                                                | Yes                           |
|    |                                         | SAFETY OF PERSONNEL AND CARGO IN SHIPPING                                                                               |                                                                                                                                                   |                                                                                                     |                               |
| 5  | INFORMATION EXCHANGE AND DOCUMENTATION  | EXCHANGE OF REAL TIME INFORMATION BETWEEN MOS SERVICE STAKEHOLDERS REGARDING DOCUMENTATION OF THE PROVIDED MOS SERVICES | AVAILABILITY OF SUITABLE ICT SYSTEM FOR REMOTE REAL TIME INFORMATION EXCHANGE (ELECTRONIC DOCUMENT TRANSFER) BETWEEN ALL MOS SERVICE STAKEHOLDERS | Is the documentation exchanged electronically?                                                      | not always                    |
|    |                                         |                                                                                                                         | Coordination between ports of origin and destination                                                                                              | Is there an exchange of documents between starting points and destination?                          | No                            |
|    |                                         |                                                                                                                         | Communication of cargo documentation well in advance of ship arrival in port                                                                      | Is the documentation exchanged electronically?                                                      | No                            |
|    |                                         |                                                                                                                         |                                                                                                                                                   | How do you assess electronic exchange of documents?                                                 | not satisfactory              |
|    |                                         |                                                                                                                         | Priority assignment to MoS services for procedures and dispatch                                                                                   | Is there a priority for MoS services?                                                               | Yes                           |
|    |                                         | FAST CLEARING OF MOS SUBJECTS (TRANSPORT MEANS, CARGO AND PASSENGERS) FROM DOCUMENT AND PHYSICAL INSPECTIONS            | Identify regular MoS customers and certify them in advance so that they can be easily cleared (create relevant data bases)                        | Is there a regulation for acceleration and simplification of regular MoS procedures?                | No                            |
|    |                                         |                                                                                                                         |                                                                                                                                                   | How do you assess the level of this service?                                                        | Not satisfactory              |
|    |                                         | STREAMLINE D DOCUMENT AND PHYSICAL INSPECTIONS BY CUSTOMS                                                               | Priority assigned to MoS cargo (special queue line)                                                                                               | Is there a regulation for acceleration and simplification of regular MoS services?                  | No                            |
|    |                                         |                                                                                                                         |                                                                                                                                                   | How do you assess the level of this service?                                                        | Not satisfactory              |
|    |                                         |                                                                                                                         |                                                                                                                                                   | Is there a special infrastructure (road, parking space, inspection point, etc.) for MoS services?   | No                            |
|    |                                         |                                                                                                                         |                                                                                                                                                   | Do you find it useful?                                                                              | Yes                           |
|    |                                         | COORDINATE D CUSTOMS AND SAFETY INSPECTIONS                                                                             | Coordination of routine inspections between different authorities                                                                                 | Is there coordination between all inspection services in order to accelerate necessary inspections? | No                            |
|    |                                         |                                                                                                                         |                                                                                                                                                   | Is it at a satisfactory level?                                                                      | good, but improvements needed |
| 6. | MoS SERVICE PROMOTION AND IMPLEMENTATIO | PROMOTION AL ACTIVITIES                                                                                                 | Promotional centres                                                                                                                               | Is the promotion conducted by the operators or the regional body?                                   | operator                      |
|    |                                         |                                                                                                                         |                                                                                                                                                   | Is there a national/ regional body in charge of promotion? (IPC, SPC)                               | SCP Italy                     |
|    |                                         |                                                                                                                         |                                                                                                                                                   | How do you assess this system?                                                                      | Not satisfactory              |

|    |                                 |                                                              |                            |                                                                                                                            |                  |
|----|---------------------------------|--------------------------------------------------------------|----------------------------|----------------------------------------------------------------------------------------------------------------------------|------------------|
|    | N FORM ORIGIN<br>TO DESTINATION |                                                              | Promotion system           | How do you assess the level of promotion?                                                                                  | Not satisfactory |
|    |                                 |                                                              |                            | How do you assess the importance of promotion for insurance of successful services?                                        | Not satisfactory |
|    |                                 |                                                              |                            | Is the promotion conducted individually in the countries or for the complete route/service?                                | Individually     |
|    |                                 |                                                              |                            | Is there a systematic identification of bottlenecks?                                                                       | No               |
|    |                                 | SUSTAINABLE<br>AND<br>SYSTEMATIC<br>BOTTLENECK<br>MANAGEMENT |                            | Are all responsible bodies in the countries that use the service included? (Ministry, port authorities, Police, Customs..) | No               |
|    |                                 |                                                              |                            | Are all subjects in the transport chain called for the identification?                                                     | No               |
|    |                                 |                                                              |                            | How do you assess the success of this model?                                                                               | Not satisfactory |
|    |                                 |                                                              |                            |                                                                                                                            |                  |
|    |                                 | ICT SUPPORT                                                  | Route plan                 | Is there a service database on the whole route?                                                                            | No               |
|    |                                 |                                                              |                            | Is the update of the base satisfactory?                                                                                    | No               |
|    |                                 |                                                              | Promotion of intermodality | How do you assess usefulness of this tool?                                                                                 | Not satisfactory |
|    |                                 |                                                              |                            |                                                                                                                            |                  |
|    |                                 | Electronic data interchange                                  |                            | Is the exchange of documents on the whole route/service including the road assured?                                        | No               |
|    |                                 |                                                              |                            | How do you assess usefulness of this service?                                                                              | Not satisfactory |
|    |                                 |                                                              |                            |                                                                                                                            |                  |
|    |                                 |                                                              |                            |                                                                                                                            |                  |
| 7. | ECOLOGICAL<br>ASPECT            | GENERAL                                                      |                            | Are there complaints for environmental pollution related to MoS services?                                                  | No               |
|    |                                 |                                                              |                            | Is the functioning of MoS service resulting in significant environmental pollution (air, sea, land)?                       | No               |
|    |                                 | PORT                                                         | WASTE<br>MANAGEMENT        | Is there a system for waste, sewage and bilge disposal in the harbour?                                                     | Yes              |
|    |                                 |                                                              |                            |                                                                                                                            |                  |

### Bottlenecks and missing links

#### Infrastructure:

- road and railway crossings but railway has priority

#### Organisational:

- no availability of computerized management system in the port (system that enables electronic exchange of documents between the drivers and terminal )
- no data bases of vehicles / drivers created in parallel with application of a risk management
- VTMS not fully implemented
- terminal not operable 2-10 days a year due to bad weather conditions
- obligation to all ships to use tugs even if they are in regular service
- electronic exchange of documents is partial
- need for better coordination of all services and inspections

#### Additional services:

- non-existence of join systematic promotion
- non-existence of systematic „bottleneck exercise”
- non-existence of IT route planner
- partial Quality Management implemented

## Port of Koper

|   |                                   |      |        |                                                                                                                            |           |
|---|-----------------------------------|------|--------|----------------------------------------------------------------------------------------------------------------------------|-----------|
| 1 | PORT<br>HINTERLAND<br>CONNECTIONS | ROAD | Safety |                                                                                                                            |           |
|   |                                   |      |        | Are there clearly marked routes for accessing the terminal and leaving the terminal in order to reach the highway network? | Excellent |
|   |                                   |      |        | Is the connection between the terminal and highway network at a satisfactory safety level?                                 | Excellent |

|   |                                   |                                                   |                                                            |                                                                                                                                                     |                                                                           |
|---|-----------------------------------|---------------------------------------------------|------------------------------------------------------------|-----------------------------------------------------------------------------------------------------------------------------------------------------|---------------------------------------------------------------------------|
| o |                                   |                                                   |                                                            | What is the level of technical characteristics of the road that access terminal?                                                                    | Excellent                                                                 |
|   |                                   |                                                   |                                                            |                                                                                                                                                     |                                                                           |
|   |                                   |                                                   | Access to road<br>(Way of connection from port to highway) | Is the connection passing through the urban and inhabited area?                                                                                     | no, it is entirely outside or independent (tunnel, bridge etc.) No answer |
|   |                                   |                                                   |                                                            | Is there a direct access to the highway network?                                                                                                    | No                                                                        |
|   |                                   | RAIL                                              | Safety                                                     | Is the signalization on a satisfactory level?                                                                                                       | Very satisfactory                                                         |
|   |                                   |                                                   |                                                            | Are the crossings satisfactory marked?                                                                                                              | satisfactory                                                              |
|   |                                   |                                                   |                                                            | Is the railway line in full operational level                                                                                                       | Very satisfactory                                                         |
|   |                                   |                                                   |                                                            | Is there a road and pedestrian crossing on the railway?                                                                                             | No                                                                        |
|   |                                   |                                                   | Capacity                                                   | Is the current capacity of railway infrastructure satisfying?                                                                                       | Poor respectively                                                         |
|   |                                   |                                                   |                                                            | What is the status of the railway infrastructure to the terminal with the road network?                                                             | Crossings are partial, but prioritization is necessary                    |
|   |                                   |                                                   |                                                            | Is it possible to dispatch the maximum allowed quantities of the train at once?                                                                     | No                                                                        |
|   |                                   |                                                   |                                                            | Is there a ramp for the loading/unloading of the trucks on the railway?                                                                             | Yes                                                                       |
|   |                                   |                                                   |                                                            |                                                                                                                                                     |                                                                           |
|   |                                   | INLAND<br>WATERWAYS                               | Safety                                                     | Is the safety level of the port access satisfactory?                                                                                                | Very satisfactory                                                         |
|   |                                   |                                                   | Capacity                                                   | Is the area of the port basin sufficient?                                                                                                           | Satisfactory                                                              |
|   |                                   |                                                   |                                                            | Is the capacity of the access to the terminal sufficient so the barges shouldn't be separated?                                                      | No                                                                        |
|   |                                   |                                                   | Access to road                                             | Is there a RO-RO ramp on the terminal?                                                                                                              | yes, but not in the adequate state and capacity                           |
|   | LAND-SIDE<br>TERMINAL AND<br>QUAY | INTERNAL<br>PORT ROADS                            | Wide and number of lanes                                   | Is the number of tracks on terminal roads sufficient and is their width satisfactory?                                                               | Poor respectively                                                         |
|   |                                   |                                                   | Signed post                                                | Is the terminal roads adequately marked with traffic signalization?                                                                                 | Very satisfactory                                                         |
|   |                                   |                                                   | Lighting                                                   | Are the terminal roads satisfactorily illuminated during night time?                                                                                | Satisfactory                                                              |
|   |                                   |                                                   | Road quality (maintenance)                                 | Are the terminal roads satisfactorily maintained?                                                                                                   | Very satisfactory                                                         |
|   |                                   |                                                   | Dedicated parking area                                     | Clear identification of roads from parking area                                                                                                     | Yes                                                                       |
|   |                                   | MoS<br>TERMINAL<br>AND QUEY<br>CHARACTERIS<br>TIC | Parking signposting                                        | Parking spaces are adequately signposted for identification                                                                                         | Very satisfactory                                                         |
|   |                                   |                                                   | Parking capacity                                           | Is the capacity of a parking lot sufficient?                                                                                                        | Poor respectively                                                         |
|   |                                   |                                                   | Parking characteristics                                    | Could the parking space accept all possible vehicle dimensions?                                                                                     | Poor respectively                                                         |
|   |                                   |                                                   | Terminal organization                                      | Adequately arranged, with different areas for waiting and pre-embarkation and the interior traffic areas                                            | Yes, but inadequate (not sufficient) capacity                             |
|   |                                   |                                                   | Management system                                          | Availability of computerized management system in the port (system that enables electronic exchange of documents between the drivers and terminal ) | Satisfactory                                                              |
|   |                                   |                                                   | EXISTING auxiliary services                                | Allow for an auxiliary services area close to the vehicles                                                                                          | Satisfactory                                                              |

|   |                            |                                                                                                                         |                                                               |                                                                                                                                              |                                                    |
|---|----------------------------|-------------------------------------------------------------------------------------------------------------------------|---------------------------------------------------------------|----------------------------------------------------------------------------------------------------------------------------------------------|----------------------------------------------------|
|   |                            | LOADING/UNLOADING ACTIVITIES AND STEVEDORING                                                                            | Guaranteed stevedoring service                                | Guaranteed stevedoring service<br>24 hours / day - 365 days / year                                                                           | Yes                                                |
|   |                            |                                                                                                                         | Stevedoring flexibility                                       | Guaranteed flexibility in the composition of stevedoring crews and handling equipment to absorb demand peaks in loading / unloading services | Very satisfactory                                  |
|   |                            |                                                                                                                         | Cargo handling                                                | Possibility for Port Authority to license more than one cargo handling operators within the port                                             | Yes                                                |
|   |                            |                                                                                                                         |                                                               |                                                                                                                                              |                                                    |
|   |                            | FAST ACCESS TO THE MOORING QUAY                                                                                         |                                                               | Terminal adjacent to, or close to the mooring quay                                                                                           | Yes                                                |
|   |                            | TERMINAL / QUAY SECURITY                                                                                                |                                                               | Is there specific security measures related to MoS operation in accordance with ISPS Code?                                                   | Yes                                                |
|   |                            | SAFE VEHICLE EMBARKATION / DISEMBARKATION                                                                               |                                                               | Certified RO-RO ramp service provider                                                                                                        | No                                                 |
|   |                            | FAST SAFETY AND SECURITY INSPECTIONS                                                                                    | Data bases of vehicles / drivers                              | Data bases of vehicles / drivers created in parallel with application of a risk management system                                            | Yes, under customs authority                       |
| 3 | SEA-SIDE TERMINAL AND QUAY |                                                                                                                         |                                                               |                                                                                                                                              |                                                    |
|   |                            | FAST, SAFE AND GUARANTEED SEA ACCESS OF THE TERMINAL / QUAY BY MOS VESSELS                                              | Existence of VTMISS                                           | Does VTMISS exists and is it in the function?                                                                                                | Partially under governmental authorities           |
|   |                            |                                                                                                                         | Sea-access characteristics                                    | Is the depth of the access to the shore and of the very shore sufficient for the biggest MoS ships?                                          | More than 12 meters                                |
|   |                            |                                                                                                                         | Non-operational time                                          | How much time a year is the terminal out of function for bad weather?                                                                        | from 10 to 2 days                                  |
|   |                            | MINIMISE WAITING TIMES FOR SERVICES PROVISION TO MOS VESSELS WITHIN PORT (MOORING, TUGGING, PILOTAGE, WASTE COLLECTION) | MoS service as priority                                       | Is the MoS service marked and treated as a priority in the port/terminal?                                                                    | No                                                 |
|   |                            |                                                                                                                         | Pilotage Exemption Certificate for regular MoS ships          | Is there a liability exemption for the pilots on MoS ships that regularly access the port?                                                   | No                                                 |
|   |                            |                                                                                                                         | Tug Obligation for regular MoS ships?                         | Is there an exemption of tug usage for MoS ships that regularly access the port?                                                             | Yes, for all                                       |
|   |                            |                                                                                                                         | Response time                                                 | PILOT - Time required: from the request to reaction?                                                                                         | Immediately                                        |
|   |                            |                                                                                                                         |                                                               | Needed hours for inspection authorities (veterinary, phytosanitary, etc.)                                                                    | Immediately                                        |
|   |                            |                                                                                                                         | Coordination between service operator and MoS terminal        | How would you assess the cooperation between the terminal and an agent?                                                                      | Satisfactory                                       |
|   |                            |                                                                                                                         |                                                               | How would you assess the cooperation between the terminal and a ship?                                                                        | Satisfactory                                       |
|   |                            |                                                                                                                         |                                                               |                                                                                                                                              |                                                    |
| 4 | SHIPPING OPERATIONS        | REGULAR, RELIABLE AND CONTINUOUS SHIPPING SERVICES                                                                      | Service frequency and capacity                                | Are the frequencies and a capacity satisfactory?                                                                                             | satisfactory frequencies but insufficient capacity |
|   |                            |                                                                                                                         | Vessel departure / arrival times predetermined and advertised | Are the arrival/departure tables announced?                                                                                                  | Yes                                                |
|   |                            |                                                                                                                         |                                                               |                                                                                                                                              |                                                    |

|   |  |                                                                                                                         |                                                                                                                                                   |                                                                                                     |                                    |
|---|--|-------------------------------------------------------------------------------------------------------------------------|---------------------------------------------------------------------------------------------------------------------------------------------------|-----------------------------------------------------------------------------------------------------|------------------------------------|
| 5 |  |                                                                                                                         | No interruption allowed throughout the year                                                                                                       | Are there deviations from the tables?                                                               | less than in 10 % of the cases     |
|   |  | RELIABLE SHIPPING VESSELS                                                                                               | Vessel compliance with all IMO safety / security / reliability regulations                                                                        | What is the number of detention of MoS ships regarding PSC inspection in the period of last year?   | No answer                          |
|   |  |                                                                                                                         | Bow-thruster availability                                                                                                                         | Do they have adequate bow-thrusters?                                                                | Yes                                |
|   |  | SAFETY OF PERSONNEL AND CARGO IN SHIPPING                                                                               |                                                                                                                                                   |                                                                                                     |                                    |
|   |  |                                                                                                                         | Compliance with Directives on means of securing cargo                                                                                             | Is there lack of compliance with safety regulations observed?                                       | No                                 |
|   |  | EXCHANGE OF REAL TIME INFORMATION BETWEEN MOS SERVICE STAKEHOLDERS REGARDING DOCUMENTATION OF THE PROVIDED MOS SERVICES | AVAILABILITY OF SUITABLE ICT SYSTEM FOR REMOTE REAL TIME INFORMATION EXCHANGE (ELECTRONIC DOCUMENT TRANSFER) BETWEEN ALL MOS SERVICE STAKEHOLDERS | Is the documentation exchanged electronically?                                                      | partial exchange of some documents |
|   |  |                                                                                                                         | Coordination between ports of origin and destination                                                                                              | Is there an exchange of documents between starting points and destination?                          | partially satisfactory             |
|   |  |                                                                                                                         | Communication of cargo documentation well in advance of ship arrival in port                                                                      | Is the documentation exchanged electronically?                                                      | partial exchange of some documents |
|   |  |                                                                                                                         |                                                                                                                                                   | How do you assess electronic exchange of documents?                                                 | partially satisfactory             |
|   |  |                                                                                                                         | Priority assignment to MoS services for procedures and dispatch                                                                                   | Is there a priority for MoS services?                                                               | No                                 |
|   |  | FAST CLEARING OF MOS SUBJECTS (TRANSPORT MEANS, CARGO AND PASSENGERS) FROM DOCUMENT AND PHYSICAL INSPECTIONS            | Identify regular MoS customers and certify them in advance so that they can be easily cleared (create relevant data bases)                        | Is there a regulation for acceleration and simplification of regular MoS procedures?                | No                                 |
|   |  |                                                                                                                         |                                                                                                                                                   | How do you assess the level of this service?                                                        | Not satisfactory                   |
|   |  | STREAMLINED DOCUMENT AND PHYSICAL INSPECTIONS BY CUSTOMS                                                                | Priority assigned to MoS cargo (special queue line)                                                                                               | Is there a regulation for acceleration and simplification of regular MoS services?                  | No                                 |
|   |  |                                                                                                                         |                                                                                                                                                   | How do you assess the level of this service?                                                        | Not satisfactory                   |
|   |  |                                                                                                                         |                                                                                                                                                   | Is there a special infrastructure (road, parking space, inspection point, etc.) for MoS services?   | yes among some                     |
|   |  |                                                                                                                         |                                                                                                                                                   | Do you find it useful?                                                                              | No answer                          |
|   |  |                                                                                                                         | Coordination of routine                                                                                                                           | Is there coordination between all inspection services in order to accelerate necessary inspections? | yes among some                     |

|    |                                                                     |                                                  |                                           |                                                                                                                            |                               |
|----|---------------------------------------------------------------------|--------------------------------------------------|-------------------------------------------|----------------------------------------------------------------------------------------------------------------------------|-------------------------------|
|    |                                                                     | COORDINATE D CUSTOMS AND SAFETY INSPECTIONS      | inspections between different authorities | Is it at a satisfactory level?                                                                                             | good, but improvements needed |
| 6. | MoS SERVICE PROMOTION AND IMPLEMENTATION FORM ORIGIN TO DESTINATION | PROMOTIONAL ACTIVITIES                           | Promotional centres                       | Is the promotion conducted by the operators or the regional body?                                                          | are in charge of promotion    |
|    |                                                                     |                                                  |                                           | Is there a national/ regional body in charge of promotion? (IPC, SPC)                                                      | Yes                           |
|    |                                                                     |                                                  |                                           | How do you assess this system?                                                                                             | not good                      |
|    |                                                                     |                                                  | Promotion system                          | How do you assess the level of promotion?                                                                                  |                               |
|    |                                                                     |                                                  |                                           | How do you assess the importance of promotion for insurance of successful services?                                        | minimum benefit               |
|    |                                                                     |                                                  |                                           | Is the promotion conducted individually in the countries or for the complete route/service?                                |                               |
|    |                                                                     | SUSTAINABLE AND SYSTEMATIC BOTTLENECK MANAGEMENT |                                           | Is there a systematic identification of bottlenecks?                                                                       | Some                          |
|    |                                                                     |                                                  |                                           | Are all responsible bodies in the countries that use the service included? (Ministry, port authorities, Police, Customs..) | Some                          |
|    |                                                                     |                                                  |                                           | Are all subjects in the transport chain called for the identification?                                                     | No                            |
|    |                                                                     |                                                  |                                           | How do you assess the success of this model?                                                                               | not good                      |
|    |                                                                     | ICT SUPPORT                                      | Route plan                                | Is there a service database on the whole route?                                                                            | No                            |
|    |                                                                     |                                                  |                                           | Is the update of the base satisfactory?                                                                                    | No                            |
|    |                                                                     |                                                  | Promotion of intermodality                | How do you assess usefulness of this tool?                                                                                 | important                     |
|    |                                                                     |                                                  | Electronic data interchange               | Is the exchange of documents on the whole route/service including the road assured?                                        | No                            |
|    |                                                                     |                                                  |                                           | How do you assess usefulness of this service?                                                                              | important                     |
|    |                                                                     | QUALITY MANAGEMENT                               |                                           | Is there a system for assessment of the level of service quality from the starting point to destination?                   | No                            |
|    |                                                                     |                                                  |                                           |                                                                                                                            |                               |
| 7. | ECOLOGICAL ASPECT                                                   | GENERAL                                          |                                           | Are there complaints for environmental pollution related to MoS services?                                                  | No                            |
|    |                                                                     |                                                  |                                           | Is the functioning of MoS service resulting in significant environmental pollution (air, sea, land)?                       | No answer                     |
|    |                                                                     | PORT                                             | WASTE MANAGEMENT                          | Is there a system for waste, sewage and bilge disposal in the harbour?                                                     | Yes                           |

### Bottlenecks and missing links

#### Infrastructure:

- no direct connection terminal-highway
- railway network is inadequate capacity
- road and railway crossings but railway has priority
- terminal roads are inadequate lane number and width
- vehicle parting space is insufficient
- terminal parting area cannot accept all possible vehicle dimensions
- non-existence of areas adequately arranged, with different areas for waiting and pre-embarkation and the interior traffic

#### Organisational:

- VTMS not fully implemented
- terminal not operable 2-10 days a year due to bad weather conditions
- insufficient capacity or the ships (good frequency)
- some deviations from ship schedule noticed
- need for additional procedures in order to accelerate and simplify procedures and work on terminal

#### Additional services:

- non-existence of joint systematic promotion
- non-existence of systematic „bottleneck exercise“

- non-existence of IT route planner
- partial Quality Management implemented

# Port of Rijeka

|   |                                   |                             |                                                            |                                                                                                                            |                                                                           |
|---|-----------------------------------|-----------------------------|------------------------------------------------------------|----------------------------------------------------------------------------------------------------------------------------|---------------------------------------------------------------------------|
| 1 | PORT<br>HINTERLAND<br>CONNECTIONS | ROAD                        | Safety                                                     | Are there clearly marked routes for accessing the terminal and leaving the terminal in order to reach the highway network? | Satisfactory                                                              |
|   |                                   |                             |                                                            | Is the connection between the terminal and highway network at a satisfactory safety level?                                 | Satisfactory                                                              |
|   |                                   |                             |                                                            | What is the level of technical characteristics of the road that access terminal?                                           | Very Satisfactory                                                         |
|   |                                   |                             |                                                            |                                                                                                                            |                                                                           |
|   |                                   |                             | Access to road<br>(Way of connection from port to highway) | Is the connection passing through the urban and inhabited area?                                                            | no, it is entirely outside or independent (tunnel, bridge etc.) No answer |
|   |                                   |                             |                                                            | Is there a direct access to the highway network?                                                                           | Yes                                                                       |
|   |                                   | RAIL                        | Safety                                                     | Is the signalization on a satisfactory level?                                                                              | Satisfactory                                                              |
|   |                                   |                             |                                                            | Are the crossings satisfactory marked?                                                                                     | Satisfactory                                                              |
|   |                                   |                             |                                                            | Is the railway line in full operational level                                                                              | Poor respectively                                                         |
|   |                                   |                             |                                                            | Is there a road and pedestrian crossing on the railway?                                                                    | no                                                                        |
|   |                                   |                             | Capacity                                                   | Is the current capacity of railway infrastructure satisfying?                                                              | Poor respectively                                                         |
|   |                                   |                             |                                                            | What is the status of the railway infrastructure to the terminal with the road network?                                    | Yes entirely                                                              |
|   |                                   |                             |                                                            | Is it possible to dispatch the maximum allowed quantities of the train at once?                                            | no                                                                        |
|   |                                   |                             |                                                            | Is there a ramp for the loading/unloading of the trucks on the railway?                                                    | no                                                                        |
|   |                                   |                             |                                                            |                                                                                                                            |                                                                           |
|   |                                   | INLAND<br>WATERWAYS         | Safety                                                     | Is the safety level of the port access satisfactory?                                                                       | Very satisfactory                                                         |
|   |                                   |                             | Capacity                                                   | Is the area of the port basin sufficient?                                                                                  | Very relevant                                                             |
|   |                                   |                             |                                                            | Is the capacity of the access to the terminal sufficient so the barges shouldn't be separated?                             | Very poor/Non-existent                                                    |
|   |                                   |                             | Access to road                                             | Is there a RO-RO ramp on the terminal?                                                                                     | yes                                                                       |
| o | LAND-SIDE<br>TERMINAL AND<br>QUAY | INTERNAL<br>PORT ROADS      | Wide and number of lanes                                   | Is the number of tracks on terminal roads sufficient and is their width satisfactory?                                      | Very satisfactory                                                         |
|   |                                   |                             | Signed post                                                | Is the terminal roads adequately marked with traffic signalization?                                                        | Very satisfactory                                                         |
|   |                                   |                             | Lighting                                                   | Are the terminal roads satisfactorily illuminated during night time?                                                       | Very satisfactory                                                         |
|   |                                   |                             | Road quality (maintanance)                                 | Are the terminal roads satisfactorily maintained?                                                                          | Very satisfactory                                                         |
|   |                                   |                             | Dedicated parking area                                     | Clear identification of roads from parking area                                                                            | yes                                                                       |
|   |                                   | MoS<br>TERMINAL<br>AND QUEY | Parking signposting                                        | Parking spaces are adequately signposted for identification                                                                | Poor respectively                                                         |
|   |                                   |                             | Parking capacity                                           | Is the capacity of a parking lot sufficient?                                                                               | Poor respectively                                                         |

|                                                         |                                     |                                                                                                                                                             |                                                                 |                                                                                                                                                           |                                        |                                                                                               |     |
|---------------------------------------------------------|-------------------------------------|-------------------------------------------------------------------------------------------------------------------------------------------------------------|-----------------------------------------------------------------|-----------------------------------------------------------------------------------------------------------------------------------------------------------|----------------------------------------|-----------------------------------------------------------------------------------------------|-----|
|                                                         |                                     | CHARACTERIS<br>TIC                                                                                                                                          | Parking<br>characteristics                                      | Could the parking space accept all possible vehicle<br>dimensions?                                                                                        | Poor respectively                      |                                                                                               |     |
|                                                         |                                     |                                                                                                                                                             | Terminal<br>organization                                        | Adequately arranged, with different areas for waiting<br>and pre-embarkation and the interior traffic areas                                               | no                                     |                                                                                               |     |
|                                                         |                                     |                                                                                                                                                             | Management<br>system                                            | Availability of computerized management system in<br>the port (system that enables electronic exchange of<br>documents between the drivers and terminal ) | Excellent                              |                                                                                               |     |
|                                                         |                                     |                                                                                                                                                             | EXISTING auxiliary<br>services                                  | Allow for an auxiliary services area close to the vehicles                                                                                                | Poor respectively                      |                                                                                               |     |
|                                                         |                                     | LOADING/UN<br>LOADIG<br>ACTIVITIES<br>AND<br>STEVEDEROIN<br>G                                                                                               | Guaranteed<br>stevedoring<br>service                            | Guaranteed stevedoring service<br>24 hours / day - 365 days / year                                                                                        | yes                                    |                                                                                               |     |
|                                                         |                                     |                                                                                                                                                             | Stevedoring<br>flexibility                                      | Guaranteed flexibility in the<br>composition of stevedoring<br>crews and handling equipment<br>to absorb demand peaks in<br>loading / unloading services  | Very satisfactory                      |                                                                                               |     |
|                                                         |                                     |                                                                                                                                                             | Cargo handling                                                  | Possibility for Port Authority to<br>license more than one cargo handling<br>operators within the port                                                    | no                                     |                                                                                               |     |
|                                                         |                                     |                                                                                                                                                             |                                                                 |                                                                                                                                                           |                                        |                                                                                               |     |
|                                                         |                                     |                                                                                                                                                             |                                                                 | FAST ACCESS<br>TO THE<br>MOORING<br>QUAY                                                                                                                  |                                        | Terminal adjacent to, or close to the mooring quay                                            | yes |
|                                                         |                                     |                                                                                                                                                             |                                                                 | TERMINAL /<br>QUAY<br>SECURITY                                                                                                                            |                                        | Is there specific security measures related to MoS<br>operation in accordance with ISPS Code? | yes |
| SAFE VEHICLE<br>EMBARKATIO<br>N /<br>DISEMBARKA<br>TION |                                     |                                                                                                                                                             |                                                                 | Certified RO-RO ramp service provider                                                                                                                     | yes                                    |                                                                                               |     |
| FAST SAFETY<br>AND<br>SECURITY<br>INSPECTIONS           | Data bases of<br>vehicles / drivers |                                                                                                                                                             |                                                                 | Data bases of vehicles / drivers<br>created in parallel with application of a risk<br>management system                                                   | Yes, under police<br>authoritiy        |                                                                                               |     |
| 3                                                       | SEA-SIDE<br>TERMINAL AND<br>QUAY    |                                                                                                                                                             |                                                                 |                                                                                                                                                           |                                        |                                                                                               |     |
|                                                         |                                     | FAST, SAFE<br>AND<br>GUARANTEED<br>SEA<br>ACCESS OF<br>THE<br>TERMINAL /<br>QUAY<br>BY MOS<br>VESSELS                                                       | Existence of<br>VTMIS                                           | Does VTMIS exists and is it in the function?                                                                                                              | Yes fully<br>implemented and<br>in use |                                                                                               |     |
|                                                         |                                     |                                                                                                                                                             | Sea-access<br>characteristics                                   | Is the depth of the access to the shore and of the very<br>shore sufficient for the biggest MoS ships?                                                    | 10-12 m                                |                                                                                               |     |
|                                                         |                                     |                                                                                                                                                             | Non-operational<br>time                                         | How much time a year is the terminal out of function<br>for bad weather?                                                                                  | Bellow 2 days                          |                                                                                               |     |
|                                                         |                                     | MINIMISE<br>WAITING<br>TIMES FOR<br>SERVICES<br>PROVISION<br>TO MOS<br>VESSELS<br>WITHIN PORT<br>(MOORING,<br>TUGGING,<br>PILOTAGE,<br>WASTE<br>COLLECTION) | MoS service as<br>priority                                      | Is the MoS service marked and treated as a priority in<br>the port/terminal?                                                                              | no                                     |                                                                                               |     |
|                                                         |                                     |                                                                                                                                                             | Pilotage<br>Exemption<br>Certificate for<br>regular MoS ships   | Is there a liability exemption for the pilots on MoS<br>ships that regularly access the port?                                                             | no                                     |                                                                                               |     |
|                                                         |                                     |                                                                                                                                                             | Tug Obligation for<br>regular MoS<br>ships?                     | Is there an exemption of tug usage for MoS ships that<br>regularly access the port?                                                                       | no                                     |                                                                                               |     |
|                                                         |                                     |                                                                                                                                                             | Response time                                                   | PILOT - Time required: from the request to reaction?                                                                                                      | Bellow 3 hours                         |                                                                                               |     |
|                                                         |                                     |                                                                                                                                                             |                                                                 | Needed hours for inspection authorities (veterinary,<br>phitosanitary, etc.)                                                                              | Bellow 3 hours                         |                                                                                               |     |
|                                                         |                                     |                                                                                                                                                             | Coordination<br>between service<br>operator and MoS<br>terminal | How would you assess the cooperation between the<br>terminal and an agent?                                                                                | Satisfactory                           |                                                                                               |     |
|                                                         |                                     |                                                                                                                                                             |                                                                 | How would you assess the cooperation between the<br>terminal and a ship?                                                                                  | Satisfactory                           |                                                                                               |     |

|   |                                        |                                                                                                                         |                                                                                                                                                   |                                                                                                   |                                                    |
|---|----------------------------------------|-------------------------------------------------------------------------------------------------------------------------|---------------------------------------------------------------------------------------------------------------------------------------------------|---------------------------------------------------------------------------------------------------|----------------------------------------------------|
| 4 | SHIPPING OPERATIONS                    | REGULAR, RELIABLE AND CONTINUOUS SHIPPING SERVICES                                                                      | Service frequency and capacity                                                                                                                    | Are the frequencies and a capacity satisfactory?                                                  | satisfactory capacity but insufficient frequencies |
|   |                                        |                                                                                                                         | Vessel departure / arrival times predetermined and advertised                                                                                     | Are the arrival/departure tables announced?                                                       | yes                                                |
|   |                                        |                                                                                                                         | No interruption allowed throughout the year                                                                                                       | Are there deviations from the tables?                                                             | yes                                                |
|   |                                        | RELIABLE SHIPPING VESSELS                                                                                               | Vessel compliance with all IMO safety / security / reliability regulations                                                                        | What is the number of detention of MoS ships regarding PSC inspection in the period of last year? | 0                                                  |
|   |                                        |                                                                                                                         | Bow-thruster availability                                                                                                                         | Do they have adequate bow-thrusters?                                                              | yes, all                                           |
|   |                                        | SAFETY OF PERSONNEL AND CARGO IN SHIPPING                                                                               |                                                                                                                                                   |                                                                                                   |                                                    |
|   |                                        |                                                                                                                         | Compliance with Directives on means of securing cargo                                                                                             | Is there lack of compliance with safety regulations observed?                                     | no                                                 |
|   |                                        |                                                                                                                         |                                                                                                                                                   |                                                                                                   |                                                    |
| 5 | INFORMATION EXCHANGE AND DOCUMENTATION | EXCHANGE OF REAL TIME INFORMATION BETWEEN MOS SERVICE STAKEHOLDERS REGARDING DOCUMENTATION OF THE PROVIDED MOS SERVICES | AVAILABILITY OF SUITABLE ICT SYSTEM FOR REMOTE REAL TIME INFORMATION EXCHANGE (ELECTRONIC DOCUMENT TRANSFER) BETWEEN ALL MOS SERVICE STAKEHOLDERS | Is the documentation exchanged electronically?                                                    | completely                                         |
|   |                                        |                                                                                                                         | Coordination between ports of origin and destination                                                                                              | Is there an exchange of documents between starting points and destination?                        | completely                                         |
|   |                                        |                                                                                                                         | Communication of cargo documentation well in advance of ship arrival in port                                                                      | Is the documentation exchanged electronically?                                                    |                                                    |
|   |                                        |                                                                                                                         |                                                                                                                                                   | How do you assess electronic exchange of documents?                                               | satisfactory                                       |
|   |                                        |                                                                                                                         | Priority assignment to MoS services for procedures and dispatch                                                                                   | Is there a priority for MoS services?                                                             | no                                                 |
|   |                                        | FAST CLEARING OF MOS SUBJECTS (TRANSPORT MEANS, CARGO AND PASSENGERS) FROM DOCUMENT AND PHYSICAL INSPECTIONS            | Identify regular MoS customers and certify them in advance so that they can be easily cleared (create relevant data bases)                        | Is there a regulation for acceleration and simplification of regular MoS procedures?              | no                                                 |
|   |                                        |                                                                                                                         |                                                                                                                                                   | How do you assess the level of this service?                                                      | good but improvements needed                       |
|   |                                        | STREAMLINED                                                                                                             | Priority assigned to MoS cargo                                                                                                                    | Is there a regulation for acceleration and simplification of regular MoS services?                | no                                                 |
|   |                                        |                                                                                                                         |                                                                                                                                                   |                                                                                                   |                                                    |
|   |                                        |                                                                                                                         |                                                                                                                                                   |                                                                                                   |                                                    |

|    |                                                                     |                                                  |                                                                   |                                                                                                                            |                                   |
|----|---------------------------------------------------------------------|--------------------------------------------------|-------------------------------------------------------------------|----------------------------------------------------------------------------------------------------------------------------|-----------------------------------|
|    |                                                                     | DOCUMENT AND PHYSICAL INSPECTIONS BY CUSTOMS     | (special queue line)                                              | How do you assess the level of this service?                                                                               | good but improvements needed      |
|    |                                                                     |                                                  |                                                                   | Is there a special infrastructure (road, parking space, inspection point, etc.) for MoS services?                          | yes                               |
|    |                                                                     |                                                  |                                                                   | Do you find it useful?                                                                                                     |                                   |
|    |                                                                     | COORDINATED CUSTOMS AND SAFETY INSPECTIONS       | Coordination of routine inspections between different authorities | Is there coordination between all inspection services in order to accelerate necessary inspections?                        | Yes, among some                   |
|    |                                                                     |                                                  |                                                                   | Is it at a satisfactory level?                                                                                             | good, but improvements needed     |
|    |                                                                     |                                                  |                                                                   |                                                                                                                            |                                   |
| 6. | MoS SERVICE PROMOTION AND IMPLEMENTATION FROM ORIGIN TO DESTINATION | PROMOTIONAL ACTIVITIES                           | Promotional centres                                               | Is the promotion conducted by the operators or the regional body?                                                          | no                                |
|    |                                                                     |                                                  |                                                                   | Is there a national/ regional body in charge of promotion? (IPC, SPC)                                                      | no                                |
|    |                                                                     |                                                  |                                                                   | How do you assess this system?                                                                                             | Not good                          |
|    |                                                                     |                                                  | Promotion system                                                  | How do you assess the level of promotion?                                                                                  |                                   |
|    |                                                                     |                                                  |                                                                   | How do you assess the importance of promotion for insurance of successful services?                                        | minimum benefit                   |
|    |                                                                     |                                                  |                                                                   | Is the promotion conducted individually in the countries or for the complete route/service?                                | individually                      |
|    |                                                                     | SUSTAINABLE AND SYSTEMATIC BOTTLENECK MANAGEMENT |                                                                   | Is there a systematic identification of bottlenecks?                                                                       | No                                |
|    |                                                                     |                                                  |                                                                   | Are all responsible bodies in the countries that use the service included? (Ministry, port authorities, Police, Customs..) | No                                |
|    |                                                                     |                                                  |                                                                   | Are all subjects in the transport chain called for the identification?                                                     | No                                |
|    |                                                                     |                                                  |                                                                   | How do you assess the success of this model?                                                                               | satisfactory                      |
|    |                                                                     | ICT SUPPORT                                      | Route plan                                                        | Is there a service database on the whole route?                                                                            | No                                |
|    |                                                                     |                                                  |                                                                   | Is the update of the base satisfactory?                                                                                    | No                                |
|    |                                                                     |                                                  | Promotion of intermodality                                        | How do you assess usefulness of this tool?                                                                                 | irrelevant                        |
|    |                                                                     |                                                  |                                                                   |                                                                                                                            |                                   |
|    |                                                                     |                                                  | Electronic data interchange                                       | Is the exchange of documents on the whole route/service including the road assured?                                        | no                                |
|    |                                                                     |                                                  |                                                                   | How do you assess usefulness of this service?                                                                              | irrelevant                        |
|    |                                                                     | QUALITY MANAGEMENT                               |                                                                   | Is there a system for assessment of the level of service quality from the starting point to destination?                   | no                                |
|    |                                                                     |                                                  |                                                                   |                                                                                                                            |                                   |
| 7. | ECOLOGICAL ASPECT                                                   | GENERAL                                          |                                                                   | Are there complaints for environmental pollution related to MoS services?                                                  | No                                |
|    |                                                                     |                                                  |                                                                   | Is the functioning of MoS service resulting in significant environmental pollution (air, sea, land)?                       | no                                |
|    |                                                                     | PORT                                             | WASTE MANAGEMENT                                                  | Is there a system for waste, sewage and bilge disposal in the harbour?                                                     | yes, but only some sorts of waste |

### Bottlenecks and missing links

#### Infrastructure:

- inadequate railway infrastructure at terminal
- not possible to dispatch the maximum quantities of the train at once
- no RO-LA ramp
- parking spaces are not adequately signposted for identification
- capacity of a parking lot at terminal not sufficient
- parking area at terminal cannot accept all possible vehicle dimensions
- terminal area has no adequately arranged, with different areas for waiting and pre-embarkation and the interior traffic
- non-existence of auxiliary services area close to the vehicles
- quay sea depth does not allow ship draught over 12 m

#### Organisational:

- MoS services are not priority

- no liability exemption for the pilots on MoS ships that regularly access the port
- no exemption of tug usage for MoS ships that regularly access the port
- inadequate frequency of MoS ships
- some deviations from ship schedule noticed
- need for additional procedures in order to accelerate and simplify procedures and work on terminal
- need for additional procedures in order to accelerate and simplify customs procedures

Additional services:

- non-existence of joint systematic promotion
- non-existence of systematic „bottleneck exercise“
- non-existence of IT route planner
- Quality Management not implemented
- Waste reception – waste reception facilities inadequate

## Port of Zadar

|   |                                   |                        |                                                            |                                                                                                                            |                                                                           |
|---|-----------------------------------|------------------------|------------------------------------------------------------|----------------------------------------------------------------------------------------------------------------------------|---------------------------------------------------------------------------|
| 1 | PORT<br>HINTERLAND<br>CONNECTIONS | ROAD                   | Safety                                                     | Are there clearly marked routes for accessing the terminal and leaving the terminal in order to reach the highway network? | Excellent                                                                 |
|   |                                   |                        |                                                            | Is the connection between the terminal and highway network at a satisfactory safety level?                                 | Excellent                                                                 |
|   |                                   |                        |                                                            | What is the level of technical characteristics of the road that access terminal?                                           | Excellent                                                                 |
|   |                                   |                        |                                                            |                                                                                                                            |                                                                           |
|   |                                   |                        | Access to road<br>(Way of connection from port to highway) | Is the connection passing through the urban and inhabited area?                                                            | no, it is entirely outside or independent (tunnel, bridge etc.) No answer |
|   |                                   |                        |                                                            | Is there a direct access to the highway network?                                                                           | Yes                                                                       |
|   |                                   | RAIL                   | Safety                                                     | Is the signalization on a satisfactory level?                                                                              | Poor respectively                                                         |
|   |                                   |                        |                                                            | Are the crossings satisfactory marked?                                                                                     | Poor respectively                                                         |
|   |                                   |                        |                                                            | Is the railway line in full operational level                                                                              | Poor respectively                                                         |
|   |                                   |                        |                                                            | Is there a road and pedestrian crossing on the railway?                                                                    | Poor respectively                                                         |
|   |                                   |                        | Capacity                                                   | Is the current capacity of railway infrastructure satisfying?                                                              | no                                                                        |
|   |                                   |                        |                                                            | What is the status of the railway infrastructure to the terminal with the road network?                                    | Very bad                                                                  |
|   |                                   |                        |                                                            | Is it possible to dispatch the maximum allowed quantities of the train at once?                                            | No                                                                        |
|   |                                   |                        |                                                            | Is there a ramp for the loading/unloading of the trucks on the railway?                                                    | No                                                                        |
|   |                                   |                        |                                                            |                                                                                                                            |                                                                           |
|   |                                   | INLAND<br>WATERWAYS    | Safety                                                     | Is the safety level of the port access satisfactory?                                                                       | Very satisfactory                                                         |
|   |                                   |                        | Capacity                                                   | Is the area of the port basin sufficient?                                                                                  | Very satisfactory                                                         |
|   |                                   |                        |                                                            | Is the capacity of the access to the terminal sufficient so the barges shouldn't be separated?                             | No answer                                                                 |
|   |                                   |                        | Access to road                                             | Is there a RO-RO ramp on the terminal?                                                                                     | Yes                                                                       |
| o |                                   | INTERNAL<br>PORT ROADS | Wide and number of lanes                                   | Is the number of tracks on terminal roads sufficient and is their width satisfactory?                                      | Excellent                                                                 |

|   |                                   |                                                                            |                                                      |                                                                                                                                                     |                   |
|---|-----------------------------------|----------------------------------------------------------------------------|------------------------------------------------------|-----------------------------------------------------------------------------------------------------------------------------------------------------|-------------------|
|   | LAND-SIDE<br>TERMINAL AND<br>QUAY |                                                                            | Signed post                                          | Is the terminal roads adequately marked with traffic signalization?                                                                                 | No                |
|   |                                   |                                                                            | Lighting                                             | Are the terminal roads satisfactorily illuminated during night time?                                                                                | No                |
|   |                                   |                                                                            | Road quality (maintanance)                           | Are the terminal roads satisfactorily maintained?                                                                                                   | No                |
|   |                                   |                                                                            | Dedicated parking area                               | Clear identification of roads from parking area                                                                                                     | Yes               |
|   |                                   | MoS<br>TERMINAL<br>AND QUEY<br>CHARACTERIS<br>TIC                          | Parking signposting                                  | Parking spaces are adequately signposted for identification                                                                                         | Satisfactory      |
|   |                                   |                                                                            | Parking capacity                                     | Is the capacity of a parking lot sufficient?                                                                                                        | Very satisfactory |
|   |                                   |                                                                            | Parking characteristics                              | Could the parking space accept all possible vehicle dimensions?                                                                                     | Very satisfactory |
|   |                                   |                                                                            | Terminal organization                                | Adequately arranged, with different areas for waiting and pre-embarkation and the interior traffic areas                                            | No                |
|   |                                   |                                                                            | Management system                                    | Availability of computerized management system in the port (system that enables electronic exchange of documents between the drivers and terminal ) | No                |
|   |                                   |                                                                            | EXISTING auxiliary services                          | Allow for an auxiliary services area close to the vehicles                                                                                          | No                |
|   |                                   | LOADING/UN<br>LOADING<br>ACTIVITIES<br>AND<br>STEVEDORIN<br>G              | Guaranteed stevedoring service                       | Guaranteed stevedoring service<br>24 hours / day - 365 days / year                                                                                  | No                |
|   |                                   |                                                                            | Stevedoring flexibility                              | Guaranteed flexibility in the composition of stevedoring crews and handling equipment to absorb demand peaks in loading / unloading services        | Satisfactory      |
|   |                                   |                                                                            | Cargo handling                                       | Possibility for Port Authority to license more than one cargo handling operators within the port                                                    | Yes               |
|   |                                   |                                                                            |                                                      |                                                                                                                                                     |                   |
|   |                                   | FAST ACCESS TO THE MOORING QUAY                                            |                                                      | Terminal adjacent to, or close to the mooring quay                                                                                                  | Yes               |
|   |                                   | TERMINAL / QUAY SECURITY                                                   |                                                      | Is there specific security measures related to MoS operation in accordance with ISPS Code?                                                          | No                |
|   |                                   | SAFE VEHICLE EMBARKATION / DISEMBARKATION                                  |                                                      | Certified RO-RO ramp service provider                                                                                                               | No                |
|   |                                   | FAST SAFETY AND SECURITY INSPECTIONS                                       | Data bases of vehicles / drivers                     | Data bases of vehicles / drivers created in parallel with application of a risk management system                                                   | No                |
| 3 | SEA-SIDE<br>TERMINAL AND<br>QUAY  |                                                                            |                                                      |                                                                                                                                                     |                   |
|   |                                   | FAST, SAFE AND GUARANTEED SEA ACCESS OF THE TERMINAL / QUAY BY MOS VESSELS | Existence of VTMISS                                  | Does VTMISS exists and is it in the function?                                                                                                       | No                |
|   |                                   |                                                                            | Sea-access characteristics                           | Is the depth of the access to the shore and of the very shore sufficient for the biggest MoS ships?                                                 | More than 12 m    |
|   |                                   |                                                                            | Non-operational time                                 | How much time a year is the terminal out of function for bad weather?                                                                               | Bellow 2 days     |
|   |                                   | MINIMISE WAITING TIMES FOR SERVICES PROVISION TO MOS                       | MoS service as priority                              | Is the MoS service marked and treated as a priority in the port/terminal?                                                                           | Yes               |
|   |                                   |                                                                            | Pilotage Exemption Certificate for regular MoS ships | Is there a liability exemption for the pilots on MoS ships that regularly access the port?                                                          | No                |

|   |                                        |                                                                                                                         |                                                                                                                                                   |                                                                                                   |                                                    |
|---|----------------------------------------|-------------------------------------------------------------------------------------------------------------------------|---------------------------------------------------------------------------------------------------------------------------------------------------|---------------------------------------------------------------------------------------------------|----------------------------------------------------|
|   |                                        | VESSELS WITHIN PORT (MOORING, TUGGING, PILOTAGE, WASTE COLLECTION)                                                      | Tug Obligation for regular MoS ships?                                                                                                             | Is there an exemption of tug usage for MoS ships that regularly access the port?                  | No                                                 |
|   |                                        |                                                                                                                         | Response time                                                                                                                                     | PILOT - Time required: from the request to reaction?                                              | No answer                                          |
|   |                                        |                                                                                                                         |                                                                                                                                                   | Needed hours for inspection authorities (veterinary, phitosanitary, etc.)                         | No answer                                          |
|   |                                        |                                                                                                                         | Coordination between service operator and MoS terminal                                                                                            | How would you assess the cooperation between the terminal and an agent?                           | Good but changes are necessary                     |
|   |                                        |                                                                                                                         |                                                                                                                                                   | How would you assess the cooperation between the terminal and a ship?                             | Good but changes are necessary                     |
| 4 | SHIPPING OPERATIONS                    | REGULAR, RELIABLE AND CONTINUOUS SHIPPING SERVICES                                                                      | Service frequency and capacity                                                                                                                    | Are the frequencies and a capacity satisfactory?                                                  | satisfactory capacity but insufficient frequencies |
|   |                                        |                                                                                                                         | Vessel departure / arrival times predetermined and advertised                                                                                     | Are the arrival/departure tables announced?                                                       | Yes                                                |
|   |                                        |                                                                                                                         | No interruption allowed throughout the year                                                                                                       | Are there deviations from the tables?                                                             | Yes                                                |
|   |                                        | RELIABLE SHIPPING VESSELS                                                                                               | Vessel compliance with all IMO safety / security / reliability regulations                                                                        | What is the number of detention of MoS ships regarding PSC inspection in the period of last year? | 0                                                  |
|   |                                        |                                                                                                                         | Bow-thruster availability                                                                                                                         | Do they have adequate bow-thrusters?                                                              | Yes                                                |
|   |                                        | SAFETY OF PERSONNEL AND CARGO IN SHIPPING                                                                               |                                                                                                                                                   |                                                                                                   |                                                    |
|   |                                        |                                                                                                                         | Compliance with Directives on means of securing cargo                                                                                             | Is there lack of compliance with safety regulations observed?                                     | No                                                 |
| 5 | INFORMATION EXCHANGE AND DOCUMENTATION | EXCHANGE OF REAL TIME INFORMATION BETWEEN MOS SERVICE STAKEHOLDERS REGARDING DOCUMENTATION OF THE PROVIDED MOS SERVICES | AVAILABILITY OF SUITABLE ICT SYSTEM FOR REMOTE REAL TIME INFORMATION EXCHANGE (ELECTRONIC DOCUMENT TRANSFER) BETWEEN ALL MOS SERVICE STAKEHOLDERS | Is the documentation exchanged electronically?                                                    | partial exchange of some documents                 |
|   |                                        |                                                                                                                         | Coordination between ports of origin and destination                                                                                              | Is there an exchange of documents between starting points and destination?                        | No                                                 |
|   |                                        |                                                                                                                         | Communication of cargo documentation well in advance of ship arrival in port                                                                      | Is the documentation exchanged electronically?                                                    | partial exchange of some documents                 |
|   |                                        |                                                                                                                         |                                                                                                                                                   | How do you assess electronic exchange of documents?                                               | not satisfactory                                   |
|   |                                        |                                                                                                                         | Priority assignment to MoS services for procedures and dispatch                                                                                   | Is there a priority for MoS services?                                                             | No                                                 |

|    |                                                                     |                                                                                                              |                                                                                                                            |                                                                                                                            |                               |
|----|---------------------------------------------------------------------|--------------------------------------------------------------------------------------------------------------|----------------------------------------------------------------------------------------------------------------------------|----------------------------------------------------------------------------------------------------------------------------|-------------------------------|
|    |                                                                     | FAST CLEARING OF MOS SUBJECTS (TRANSPORT MEANS, CARGO AND PASSENGERS) FROM DOCUMENT AND PHYSICAL INSPECTIONS | Identify regular MoS customers and certify them in advance so that they can be easily cleared (create relevant data bases) | Is there a regulation for acceleration and simplification of regular MoS procedures?                                       | no                            |
|    |                                                                     |                                                                                                              |                                                                                                                            | How do you assess the level of this service?                                                                               | not satisfactory              |
|    |                                                                     | STREAMLINE D DOCUMENT AND PHYSICAL INSPECTIONS BY CUSTOMS                                                    | Priority assigned to MoS cargo (special queue line)                                                                        | Is there a regulation for acceleration and simplification of regular MoS services?                                         | no                            |
|    |                                                                     |                                                                                                              |                                                                                                                            | How do you assess the level of this service?                                                                               | not satisfactory              |
|    |                                                                     |                                                                                                              |                                                                                                                            | Is there a special infrastructure (road, parking space, inspection point, etc.) for MoS services?                          | no                            |
|    |                                                                     |                                                                                                              |                                                                                                                            | Do you find it useful?                                                                                                     | yes                           |
|    |                                                                     | COORDINATE D CUSTOMS AND SAFETY INSPECTIONS                                                                  | Coordination of routine inspections between different authorities                                                          | Is there coordination between all inspection services in order to accelerate necessary inspections?                        | yes                           |
|    |                                                                     |                                                                                                              |                                                                                                                            | Is it at a satisfactory level?                                                                                             | good, but improvements needed |
| 6. | MoS SERVICE PROMOTION AND IMPLEMENTATION FROM ORIGIN TO DESTINATION | PROMOTION AL ACTIVITIES                                                                                      | Promotional centres                                                                                                        | Is the promotion conducted by the operators or the regional body?                                                          | no                            |
|    |                                                                     |                                                                                                              |                                                                                                                            | Is there a national/ regional body in charge of promotion? (IPC, SPC)                                                      | no                            |
|    |                                                                     |                                                                                                              |                                                                                                                            | How do you assess this system?                                                                                             | not satisfactory              |
|    |                                                                     |                                                                                                              | Promotion system                                                                                                           | How do you assess the level of promotion?                                                                                  | not satisfactory              |
|    |                                                                     |                                                                                                              |                                                                                                                            | How do you assess the importance of promotion for insurance of successful services?                                        | important                     |
|    |                                                                     |                                                                                                              |                                                                                                                            | Is the promotion conducted individually in the countries or for the complete route/service?                                | individually                  |
|    |                                                                     | SUSTAINABLE AND SYSTEMATIC BOTTLENECK MANAGEMENT                                                             |                                                                                                                            | Is there a systematic identification of bottlenecks?                                                                       | no                            |
|    |                                                                     |                                                                                                              |                                                                                                                            | Are all responsible bodies in the countries that use the service included? (Ministry, port authorities, Police, Customs..) | No                            |
|    |                                                                     |                                                                                                              |                                                                                                                            | Are all subjects in the transport chain called for the identification?                                                     | No                            |
|    |                                                                     |                                                                                                              |                                                                                                                            | How do you assess the success of this model?                                                                               | low                           |
|    |                                                                     | ICT SUPPORT                                                                                                  | Route plan                                                                                                                 | Is there a service database on the whole route?                                                                            | no                            |
|    |                                                                     |                                                                                                              |                                                                                                                            | Is the update of the base satisfactory?                                                                                    | no                            |
|    |                                                                     |                                                                                                              | Promotion of intermodality                                                                                                 | How do you assess usefulness of this tool?                                                                                 | important                     |
|    |                                                                     |                                                                                                              |                                                                                                                            | Is the exchange of documents on the whole route/service including the road assured?                                        | No                            |
|    |                                                                     | QUALITY MANAGEMENT                                                                                           |                                                                                                                            | How do you assess usefulness of this service?                                                                              | important                     |
|    |                                                                     |                                                                                                              |                                                                                                                            | Is there a system for assessment of the level of service quality from the starting point to destination?                   | No                            |
| 7. | ECOLOGICAL ASPECT                                                   | GENERAL                                                                                                      |                                                                                                                            | Are there complaints for environmental pollution related to MoS services?                                                  | No                            |
|    |                                                                     |                                                                                                              |                                                                                                                            | Is the functioning of MoS service resulting in significant environmental pollution (air, sea, land)?                       | yes                           |
|    |                                                                     | PORT                                                                                                         | WASTE MANAGEMENT                                                                                                           | Is there a system for waste, sewage and bilge disposal in the harbour?                                                     | yes                           |

The ferry and cruise terminal is planned to be finished in 2014. Container terminal (Ro-ro and multipurpose) is planned but no real financial agreement.

## Bottlenecks and missing links

### Infrastructure:

- railway infrastructure exists but very limited
- no computerized management system in the port (system that enables electronic exchange of documents between the drivers and terminal )

### Organisational:

- not sufficient coordination of terminal toward agents and other institutions
- electronic exchange of documents is partial
- MoS services are not identified as priority thus
- need for additional procedures in order to accelerate and simplicate procedures and work on terminal
- need for additional procedures in order to accelerate and simplicate customs procedures

### Additional services:

- non-existence of join systematic promotion
- non-existence of systematic „bottleneck exercise”
- non-existence of IT route planner
- Quality Management not implemented
- Waste reception – waste reception facilities inadequate

# Port of Šibenik

|   |                                   |      |                                                            |                                                                                                                            |                                                          |
|---|-----------------------------------|------|------------------------------------------------------------|----------------------------------------------------------------------------------------------------------------------------|----------------------------------------------------------|
| 1 | PORT<br>HINTERLAND<br>CONNECTIONS | ROAD | Safety                                                     |                                                                                                                            |                                                          |
|   |                                   |      |                                                            | Are there clearly marked routes for accessing the terminal and leaving the terminal in order to reach the highway network? | Very satisfactory                                        |
|   |                                   |      |                                                            | Is the connection between the terminal and highway network at a satisfactory safety level?                                 | Very satisfactory                                        |
|   |                                   |      |                                                            | What is the level of technical characteristics of the road that access terminal?                                           | Satisfactory                                             |
|   |                                   |      | Access to road<br>(Way of connection from port to highway) | Is the connection passing through the urban and inhabited area?                                                            | yes, it is a nonsolvable problem                         |
|   |                                   |      |                                                            | Is there a direct access to the highway network?                                                                           | yes                                                      |
|   |                                   | RAIL | Safety                                                     | Is the signalization on a satisfactory level?                                                                              | Satisfactory                                             |
|   |                                   |      |                                                            | Are the crossings satisfactory marked?                                                                                     | Satisfactory                                             |
|   |                                   |      |                                                            | Is the railway line in full operational level                                                                              | Satisfactory                                             |
|   |                                   |      |                                                            | Is there a road and pedestrian crossing on the railway?                                                                    | yes                                                      |
|   |                                   |      | Capacity                                                   | Is the current capacity of railway infrastructure satisfying?                                                              | Satisfactory                                             |
|   |                                   |      |                                                            | What is the status of the railway infrastructure to the terminal with the road network?                                    | Partially but railway is a priority (traffic is stopped) |
|   |                                   |      |                                                            | Is it possible to dispatch the maximum allowed quantities of the train at once?                                            | yes                                                      |
|   |                                   |      |                                                            | Is there a ramp for the loading/unloading of the trucks on the railway?                                                    | no                                                       |
|   |                                   |      | Safety                                                     | Is the safety level of the port access satisfactory?                                                                       | No answer                                                |

|   |                             |                                                             |                                  |                                                                                                                                                     |                                          |
|---|-----------------------------|-------------------------------------------------------------|----------------------------------|-----------------------------------------------------------------------------------------------------------------------------------------------------|------------------------------------------|
|   |                             | INLAND WATERWAYS                                            | Capacity                         | Is the area of the port basin sufficient?                                                                                                           | No answer                                |
|   |                             |                                                             |                                  | Is the capacity of the access to the terminal sufficient so the barges shouldn't be separated?                                                      | No answer                                |
|   |                             |                                                             | Access to road                   | Is there a RO-RO ramp on the terminal?                                                                                                              | no                                       |
| o | LAND-SIDE TERMINAL AND QUAY | INTERNAL PORT ROADS                                         | Wide and number of lanes         | Is the number of tracks on terminal roads sufficient and is their width satisfactory?                                                               | Satisfactory                             |
|   |                             |                                                             | Signed post                      | Is the terminal roads adequately marked with traffic signalization?                                                                                 | Satisfactory                             |
|   |                             |                                                             | Lighting                         | Are the terminal roads satisfactorily illuminated during night time?                                                                                | Satisfactory                             |
|   |                             |                                                             | Road quality (maintenance)       | Are the terminal roads satisfactorily maintained?                                                                                                   | Satisfactory                             |
|   |                             |                                                             | Dedicated parking area           | Clear identification of roads from parking area                                                                                                     | Yes                                      |
|   |                             | MoS TERMINAL AND QUEY CHARACTERISTIC                        | Parking signposting              | Parking spaces are adequately signposted for identification                                                                                         | Satisfactory                             |
|   |                             |                                                             | Parking capacity                 | Is the capacity of a parking lot sufficient?                                                                                                        | Poor respectively                        |
|   |                             |                                                             | Parking characteristics          | Could the parking space accept all possible vehicle dimensions?                                                                                     | Poor respectively                        |
|   |                             |                                                             | Terminal organization            | Adequately arranged, with different areas for waiting and pre-embarkation and the interior traffic areas                                            | no                                       |
|   |                             |                                                             | Management system                | Availability of computerized management system in the port (system that enables electronic exchange of documents between the drivers and terminal ) | Satisfactory                             |
|   |                             |                                                             | EXISTING auxiliary services      | Allow for an auxiliary services area close to the vehicles                                                                                          | Satisfactory                             |
|   |                             | LOADING/UNLOADING ACTIVITIES AND STEVEDORING                | Guaranteed stevedoring service   | Guaranteed stevedoring service 24 hours / day - 365 days / year                                                                                     | yes                                      |
|   |                             |                                                             | Stevedoring flexibility          | Guaranteed flexibility in the composition of stevedoring crews and handling equipment to absorb demand peaks in loading / unloading services        | Very satisfactory                        |
|   |                             |                                                             | Cargo handling                   | Possibility for Port Authority to license more than one cargo handling operators within the port                                                    | Yes                                      |
|   |                             |                                                             |                                  |                                                                                                                                                     |                                          |
|   |                             | FAST ACCESS TO THE MOORING QUAY                             |                                  | Terminal adjacent to, or close to the mooring quay                                                                                                  | Yes                                      |
|   |                             | TERMINAL / QUAY SECURITY                                    |                                  | Is there specific security measures related to MoS operation in accordance with ISPS Code?                                                          | Yes                                      |
|   |                             | SAFE VEHICLE EMBARKATION / DISEMBARKATION                   |                                  | Certified RO-RO ramp service provider                                                                                                               | No                                       |
|   |                             | FAST SAFETY AND SECURITY INSPECTIONS                        | Data bases of vehicles / drivers | Data bases of vehicles / drivers created in parallel with application of a risk management system                                                   | Yes, under police authority              |
| 3 | SEA-SIDE TERMINAL AND QUAY  |                                                             |                                  |                                                                                                                                                     |                                          |
|   |                             | FAST, SAFE AND GUARANTEED SEA ACCESS OF THE TERMINAL / QUAY | Existence of VTMISS              | Does VTMISS exist and is it in the function?                                                                                                        | Partially under governmental authorities |
|   |                             |                                                             | Sea-access characteristics       | Is the depth of the access to the shore and of the very shore sufficient for the biggest MoS ships?                                                 | 6-10 m                                   |
|   |                             |                                                             | Non-operational time             | How much time a year is the terminal out of function for bad weather?                                                                               | Bellow 2 days                            |

|   |                                        |                                                                                                                         |                                                                                                                                                   |                                                                                                   |                             |
|---|----------------------------------------|-------------------------------------------------------------------------------------------------------------------------|---------------------------------------------------------------------------------------------------------------------------------------------------|---------------------------------------------------------------------------------------------------|-----------------------------|
|   |                                        | BY MOS VESSELS                                                                                                          |                                                                                                                                                   |                                                                                                   |                             |
|   |                                        | MINIMISE WAITING TIMES FOR SERVICES PROVISION TO MOS VESSELS WITHIN PORT (MOORING, TUGGING, PILOTAGE, WASTE COLLECTION) | MoS service as priority                                                                                                                           | Is the MoS service marked and treated as a priority in the port/terminal?                         | No                          |
|   |                                        |                                                                                                                         | Pilotage Exemption Certificate for regular MoS ships                                                                                              | Is there a liability exemption for the pilots on MoS ships that regularly access the port?        | yes                         |
|   |                                        |                                                                                                                         | Tug Obligation for regular MoS ships?                                                                                                             | Is there an exemption of tug usage for MoS ships that regularly access the port?                  | Yes, for ships under 500 BT |
|   |                                        |                                                                                                                         | Response time                                                                                                                                     | PILOT - Time required: from the request to reaction?                                              | Bellow 3 hours              |
|   |                                        |                                                                                                                         |                                                                                                                                                   | Needed hours for inspection authorities (veterinary, phitosanitary, etc.)                         | 6-3 hours                   |
|   |                                        |                                                                                                                         | Coordination between service operator and MoS terminal                                                                                            | How would you assess the cooperation between the terminal and an agent?                           | Satisfactory                |
|   |                                        |                                                                                                                         |                                                                                                                                                   | How would you assess the cooperation between the terminal and a ship?                             | Satisfactory                |
| 4 | SHIPPING OPERATIONS                    | REGULAR, RELIABLE AND CONTINUOUS SHIPPING SERVICES                                                                      | Service frequency and capacity                                                                                                                    |                                                                                                   |                             |
|   |                                        |                                                                                                                         |                                                                                                                                                   | Are the frequencies and a capacity satisfactory?                                                  | yes                         |
|   |                                        |                                                                                                                         | Vessel departure / arrival times predetermined and advertised                                                                                     | Are the arrival/departure tables announced?                                                       | yes                         |
|   |                                        |                                                                                                                         | No interruption allowed throughout the year                                                                                                       | Are there deviations from the tables?                                                             | yes                         |
|   |                                        | RELIABLE SHIPPING VESSELS                                                                                               | Vessel compliance with all IMO safety / security / reliability regulations                                                                        | What is the number of detention of MoS ships regarding PSC inspection in the period of last year? | No answer                   |
|   |                                        |                                                                                                                         |                                                                                                                                                   |                                                                                                   |                             |
|   |                                        |                                                                                                                         | Bow-thruster availability                                                                                                                         | Do they have adequate bow-thrusters?                                                              | Not all                     |
|   |                                        | SAFETY OF PERSONNEL AND CARGO IN SHIPPING                                                                               |                                                                                                                                                   |                                                                                                   |                             |
| 5 | INFORMATION EXCHANGE AND DOCUMENTATION | EXCHANGE OF REAL TIME INFORMATION BETWEEN MOS SERVICE STAKEHOLDERS REGARDING DOCUMENTATION OF THE PROVIDED MOS SERVICES | AVAILABILITY OF SUITABLE ICT SYSTEM FOR REMOTE REAL TIME INFORMATION EXCHANGE (ELECTRONIC DOCUMENT TRANSFER) BETWEEN ALL MOS SERVICE STAKEHOLDERS | Is the documentation exchanged electronically?                                                    | completely                  |
|   |                                        |                                                                                                                         | Coordination between ports of origin and destination                                                                                              | Is there an exchange of documents between starting points and destination?                        | completely                  |
|   |                                        |                                                                                                                         | Communication of cargo documentation well in advance of ship arrival in port                                                                      | Is the documentation exchanged electronically?                                                    |                             |
|   |                                        |                                                                                                                         |                                                                                                                                                   | How do you assess electronic exchange of documents?                                               | satisfactory                |
|   |                                        |                                                                                                                         | Priority assignment to MoS services for                                                                                                           | Is there a priority for MoS services?                                                             | No                          |
|   |                                        |                                                                                                                         |                                                                                                                                                   |                                                                                                   |                             |

|    |                                                                     |                                                                                                              |                                                                                                                            |                                                                                                                            |                  |
|----|---------------------------------------------------------------------|--------------------------------------------------------------------------------------------------------------|----------------------------------------------------------------------------------------------------------------------------|----------------------------------------------------------------------------------------------------------------------------|------------------|
|    |                                                                     |                                                                                                              | procedures and dispatch                                                                                                    |                                                                                                                            |                  |
|    |                                                                     | FAST CLEARING OF MOS SUBJECTS (TRANSPORT MEANS, CARGO AND PASSENGERS) FROM DOCUMENT AND PHYSICAL INSPECTIONS | Identify regular MoS customers and certify them in advance so that they can be easily cleared (create relevant data bases) | Is there a regulation for acceleration and simplification of regular MoS procedures?                                       | No               |
|    |                                                                     |                                                                                                              |                                                                                                                            | How do you assess the level of this service?                                                                               | not satisfactory |
|    |                                                                     | STREAMLINE D DOCUMENT AND PHYSICAL INSPECTIONS BY CUSTOMS                                                    | Priority assigned to MoS cargo (special queue line)                                                                        | Is there a regulation for acceleration and simplification of regular MoS services?                                         | yes              |
|    |                                                                     |                                                                                                              |                                                                                                                            | How do you assess the level of this service?                                                                               | not satisfactory |
|    |                                                                     |                                                                                                              |                                                                                                                            | Is there a special infrastructure (road, parking space, inspection point, etc.) for MoS services?                          | No               |
|    |                                                                     |                                                                                                              |                                                                                                                            | Do you find it useful?                                                                                                     | yes              |
|    |                                                                     | COORDINATE D CUSTOMS AND SAFETY INSPECTIONS                                                                  | Coordination of routine inspections between different authorities                                                          | Is there coordination between all inspection services in order to accelerate necessary inspections?                        | No               |
|    |                                                                     |                                                                                                              |                                                                                                                            | Is it at a satisfactory level?                                                                                             | No               |
| 6. | MoS SERVICE PROMOTION AND IMPLEMENTATION FORM ORIGIN TO DESTINATION | PROMOTION AL ACTIVITIES                                                                                      | Promotional centres                                                                                                        | Is the promotion conducted by the operators or the regional body?                                                          | operator         |
|    |                                                                     |                                                                                                              |                                                                                                                            | Is there a national/ regional body in charge of promotion? (IPC, SPC)                                                      | national         |
|    |                                                                     |                                                                                                              |                                                                                                                            | How do you assess this system?                                                                                             | not satisfactory |
|    |                                                                     |                                                                                                              | Promotion system                                                                                                           | How do you assess the level of promotion?                                                                                  | not satisfactory |
|    |                                                                     |                                                                                                              |                                                                                                                            | How do you assess the importance of promotion for insurance of successful services?                                        | important        |
|    |                                                                     |                                                                                                              |                                                                                                                            | Is the promotion conducted individually in the countries or for the complete route/service?                                | individually     |
|    |                                                                     | SUSTAINABLE AND SYSTEMATIC BOTTLENECK MANAGEMENT                                                             |                                                                                                                            | Is there a systematic identification of bottlenecks?                                                                       | some             |
|    |                                                                     |                                                                                                              |                                                                                                                            | Are all responsible bodies in the countries that use the service included? (Ministry, port authorities, Police, Customs..) | some             |
|    |                                                                     |                                                                                                              |                                                                                                                            | Are all subjects in the transport chain called for the identification?                                                     | some             |
|    |                                                                     |                                                                                                              |                                                                                                                            | How do you assess the success of this model?                                                                               | important        |
|    |                                                                     | ICT SUPPORT                                                                                                  | Route plan                                                                                                                 | Is there a service database on the whole route?                                                                            | No               |
|    |                                                                     |                                                                                                              |                                                                                                                            | Is the update of the base satisfactory?                                                                                    | No               |
|    |                                                                     |                                                                                                              | Promotion of intermodality                                                                                                 | How do you assess usefulness of this tool?                                                                                 | important        |
|    |                                                                     |                                                                                                              | Electronic data interchange                                                                                                | Is the exchange of documents on the whole route/service including the road assured?                                        | No               |
|    |                                                                     |                                                                                                              |                                                                                                                            | How do you assess usefulness of this service?                                                                              | important        |
|    |                                                                     | QUALITY MANAGEMENT                                                                                           |                                                                                                                            | Is there a system for assessment of the level of service quality from the starting point to destination?                   | No               |
|    |                                                                     |                                                                                                              |                                                                                                                            |                                                                                                                            |                  |
| 7. | ECOLOGICAL ASPECT                                                   | GENERAL                                                                                                      |                                                                                                                            | Are there complaints for environmental pollution related to MoS services?                                                  | no               |
|    |                                                                     |                                                                                                              |                                                                                                                            | Is the functioning of MoS service resulting in significant environmental pollution (air, sea, land)?                       | yes              |
|    |                                                                     | PORT                                                                                                         | WASTE MANAGEMENT                                                                                                           | Is there a system for waste, sewage and bilge disposal in the harbour?                                                     | yes              |

Port of Šibenik does not have dedicated MoS or container terminal, thus have no real experience.

## Bottlenecks and missing links

### Infrastructure:

- the road connection to port passing through the urban and inhabited area
- no direct connection terminal-highway
- railway network is inadequate capacity
- road and railway crossings but railway has priority
- terminal roads are inadequate lane number and width
- vehicle parting space is insufficient
- terminal parting area cannot accept all possible vehicle dimensions
- non-existence of areas adequately arranged, with different areas for waiting and pre-embarkation and the interior traffic
- no RO-LA ramp
- quay sea depth does not allow ship draught over 10 m

### Organisational:

- no computerized management system in the port (system that enables electronic exchange of documents between the drivers and terminal )
- tug obligated for ships over 500 BT
- Long time for response of inspection authorities (veterinary, phytosanitary, etc.) – 3-6 hours
- electronic exchange of documents is partial
- need for additional procedures in order to accelerate and simplify procedures and work on terminal

### Additional services:

- non-existence of joint systematic promotion
- non-existence of systematic „bottleneck exercise”
- non-existence of IT route planner
- partial Quality Management implemented
- Waste reception – waste reception facilities inadequate

## Port of Split (Gradska luka)

|   |                                   |      |                                                            |                                                                                                                            |                                  |
|---|-----------------------------------|------|------------------------------------------------------------|----------------------------------------------------------------------------------------------------------------------------|----------------------------------|
| 1 | PORT<br>HINTERLAND<br>CONNECTIONS | ROAD | Safety                                                     |                                                                                                                            |                                  |
|   |                                   |      |                                                            | Are there clearly marked routes for accessing the terminal and leaving the terminal in order to reach the highway network? | Satisfactory                     |
|   |                                   |      |                                                            | Is the connection between the terminal and highway network at a satisfactory safety level?                                 | Very satisfactory                |
|   |                                   |      |                                                            | What is the level of technical characteristics of the road that access terminal?                                           | Very satisfactory                |
|   |                                   |      |                                                            |                                                                                                                            |                                  |
|   |                                   | RAIL | Access to road<br>(Way of connection from port to highway) | Is the connection passing through the urban and inhabited area?                                                            | yes, it is a nonsolvable problem |
|   |                                   |      |                                                            | Is there a direct access to the highway network?                                                                           | no                               |
|   |                                   |      | Safety                                                     | Is the signalization on a satisfactory level?                                                                              | Very satisfactory                |
|   |                                   |      |                                                            | Are the crossings satisfactory marked?                                                                                     | Excellent                        |
|   |                                   |      |                                                            | Is the railway line in full operational level                                                                              | Satisfactory                     |
|   |                                   |      |                                                            | Is there a road and pedestrian crossing on the railway?                                                                    | yes                              |
|   |                                   |      | Capacity                                                   | Is the current capacity of railway infrastructure satisfying?                                                              | Satisfactory                     |

|  |   |                                              |                                |                                                                                                                                                     |                                                          |
|--|---|----------------------------------------------|--------------------------------|-----------------------------------------------------------------------------------------------------------------------------------------------------|----------------------------------------------------------|
|  |   |                                              |                                | What is the status of the railway infrastructure to the terminal with the road network?                                                             | Partially but railway is a priority (traffic is stopped) |
|  |   |                                              |                                | Is it possible to dispatch the maximum allowed quantities of the train at once?                                                                     | Yes                                                      |
|  |   |                                              |                                | Is there a ramp for the loading/unloading of the trucks on the railway?                                                                             | yes                                                      |
|  |   |                                              |                                |                                                                                                                                                     |                                                          |
|  |   | INLAND WATERWAYS                             | Safety                         | Is the safety level of the port access satisfactory?                                                                                                | No answer                                                |
|  |   |                                              | Capacity                       | Is the area of the port basin sufficient?                                                                                                           | No answer                                                |
|  |   |                                              |                                | Is the capacity of the access to the terminal sufficient so the barges shouldn't be separated?                                                      | No answer                                                |
|  |   |                                              | Access to road                 | Is there a RO-RO ramp on the terminal?                                                                                                              | No answer                                                |
|  | o | INTERNAL PORT ROADS                          | Wide and number of lanes       | Is the number of tracks on terminal roads sufficient and is their width satisfactory?                                                               | Very satisfactory                                        |
|  |   |                                              | Signed post                    | Is the terminal roads adequately marked with traffic signalization?                                                                                 | Very satisfactory                                        |
|  |   |                                              | Lighting                       | Are the terminal roads satisfactorily illuminated during night time?                                                                                | Very satisfactory                                        |
|  |   |                                              | Road quality (maintanance)     | Are the terminal roads satisfactorily maintained?                                                                                                   | Very satisfactory                                        |
|  |   |                                              | Dedicated parking area         | Clear identification of roads from parking area                                                                                                     | Yes                                                      |
|  |   | MoS TERMINAL AND QUEY CHARACTERISTIC         | Parking signposting            | Parking spaces are adequately signposted for identification                                                                                         | Satisfactory                                             |
|  |   |                                              | Parking capacity               | Is the capacity of a parking lot sufficient?                                                                                                        | Poor respectively                                        |
|  |   |                                              | Parking characteristics        | Could the parking space accept all possible vehicle dimensions?                                                                                     | Very satisfactory                                        |
|  |   |                                              | Terminal organization          | Adequately arranged, with different areas for waiting and pre-embarkation and the interior traffic areas                                            | Yes, but inadequate capacity                             |
|  |   |                                              | Management system              | Availability of computerized management system in the port (system that enables electronic exchange of documents between the drivers and terminal ) | Very poor/Non-existent                                   |
|  |   |                                              | EXISTING auxiliary services    | Existing of an auxiliary services area close to the vehicles                                                                                        | Poor respectively                                        |
|  |   | LOADING/UNLOADING ACTIVITIES AND STEVEDORING | Guaranteed stevedoring service | Guaranteed stevedoring service 24 hours / day - 365 days / year                                                                                     | yes                                                      |
|  |   |                                              | Stevedoring flexibility        | Guaranteed flexibility in the composition of stevedoring crews and handling equipment to absorb demand peaks in loading / unloading services        | Very satisfactory                                        |
|  |   |                                              | Cargo handling                 | Possibility for Port Authority to license more than one cargo handling operators within the port                                                    | Yes                                                      |
|  |   |                                              |                                |                                                                                                                                                     |                                                          |
|  |   | FAST ACCESS TO THE MOORING QUAY              |                                | Terminal adjacent to, or close to the mooring quay                                                                                                  | Yes                                                      |
|  |   | TERMINAL / QUAY SECURITY                     |                                | Is there specific security measures related to MoS operation in accordance with ISPS Code?                                                          | Yes                                                      |
|  |   | SAFE VEHICLE EMBARKATION / DISEMBARKATION    |                                | Certified RO-RO ramp service provider                                                                                                               | yes                                                      |

|   |                                        |                                                                                                                         |                                                                                                              |                                                                                                     |                                        |
|---|----------------------------------------|-------------------------------------------------------------------------------------------------------------------------|--------------------------------------------------------------------------------------------------------------|-----------------------------------------------------------------------------------------------------|----------------------------------------|
|   |                                        | FAST SAFETY AND SECURITY INSPECTIONS                                                                                    | Data bases of vehicles / drivers                                                                             | Data bases of vehicles / drivers created in parallel with application of a risk management system   | Yes, under police authority            |
| 3 | SEA-SIDE TERMINAL AND QUAY             |                                                                                                                         |                                                                                                              |                                                                                                     |                                        |
|   |                                        | FAST, SAFE AND GUARANTEED SEA ACCESS OF THE TERMINAL / QUAY BY MOS VESSELS                                              | Existence of VTMISS                                                                                          | Does VTMISS exists and is it in the function?                                                       | Yes fully implemented and in use       |
|   |                                        |                                                                                                                         | Sea-access characteristics                                                                                   | Is the depth of the access to the shore and of the very shore sufficient for the biggest MoS ships? | 10-12 m                                |
|   |                                        |                                                                                                                         | Non-operational time                                                                                         | How much time a year is the terminal out of function for bad weather?                               | Bellow 2 days                          |
|   |                                        | MINIMISE WAITING TIMES FOR SERVICES PROVISION TO MOS VESSELS WITHIN PORT (MOORING, TUGGING, PILOTAGE, WASTE COLLECTION) | MoS service as priority                                                                                      | Is the MoS service marked and treated as a priority in the port/terminal?                           | yes                                    |
|   |                                        |                                                                                                                         | Pilotage Exemption Certificate for regular MoS ships                                                         | Is there a liability exemption for the pilots on MoS ships that regularly access the port?          | yes                                    |
|   |                                        |                                                                                                                         | Tug Obligation for regular MoS ships?                                                                        | Is there an exemption of tug usage for MoS ships that regularly access the port?                    | Yes, for ships under 500 BT            |
|   |                                        |                                                                                                                         | Response time                                                                                                | PILOT - Time required: from the request to reaction?                                                | From 23 to 12 hours                    |
|   |                                        |                                                                                                                         |                                                                                                              | Needed hours for inspection authorities (veterinary, phitosanitary, etc.)                           | From 23 to 12 hours                    |
|   |                                        |                                                                                                                         | Coordination between service operator and MoS terminal                                                       | How would you assess the cooperation between the terminal and an agent?                             | Satisfactory                           |
|   |                                        |                                                                                                                         |                                                                                                              | How would you assess the cooperation between the terminal and a ship?                               | Satisfactory                           |
| 4 | SHIPPING OPERATIONS                    | REGULAR, RELIABLE AND CONTINUOUS SHIPPING SERVICES                                                                      | Service frequency and capacity                                                                               | Are the frequencies and a capacity satisfactory?                                                    | yes                                    |
|   |                                        |                                                                                                                         | Vessel departure / arrival times predetermined and advertised                                                | Are the arrival/departure tables announced?                                                         | yes but not for all services           |
|   |                                        |                                                                                                                         | No interruption allowed throughout the year                                                                  | Are there deviations from the tables?                                                               | no                                     |
|   |                                        | RELIABLE SHIPPING VESSELS                                                                                               | Vessel compliance with all IMO safety / security / reliability regulations                                   | What is the number of detention of MoS ships regarding PSC inspection in the period of last year?   | from 1 to 5                            |
|   |                                        |                                                                                                                         |                                                                                                              |                                                                                                     |                                        |
|   |                                        |                                                                                                                         | Bow-thruster availability                                                                                    | Do they have adequate bow-thrusters?                                                                | not all                                |
|   |                                        | SAFETY OF PERSONNEL AND CARGO IN SHIPPING                                                                               |                                                                                                              |                                                                                                     |                                        |
|   |                                        |                                                                                                                         | Compliance with Directives on means of securing cargo                                                        | Is there lack of compliance with safety regulations observed?                                       | yes but in less than 10 % of the cases |
| 5 | INFORMATION EXCHANGE AND DOCUMENTATION | EXCHANGE OF REAL TIME INFORMATION BETWEEN MOS SERVICE STAKEHOLDERS REGARDING                                            | AVAILABILITY OF SUITABLE ICT SYSTEM FOR REMOTE REAL TIME INFORMATION EXCHANGE (ELECTRONIC DOCUMENT TRANSFER) | Is the documentation exchanged electronically?                                                      | partial exchange of some documents     |

|    |                                                                     |                                                                                                              |                                                                                                                            |                                                                                                                            |                                    |
|----|---------------------------------------------------------------------|--------------------------------------------------------------------------------------------------------------|----------------------------------------------------------------------------------------------------------------------------|----------------------------------------------------------------------------------------------------------------------------|------------------------------------|
| 6. |                                                                     | DOCUMENTATION OF THE PROVIDED MOS SERVICES                                                                   | BETWEEN ALL MOS SERVICE STAKEHOLDERS                                                                                       |                                                                                                                            |                                    |
|    |                                                                     |                                                                                                              | Coordination between ports of origin and destination                                                                       | Is there an exchange of documents between starting points and destination?                                                 | partial exchange of some documents |
|    |                                                                     |                                                                                                              | Communication of cargo documentation well in advance of ship arrival in port                                               | Is the documentation exchanged electronically?                                                                             |                                    |
|    |                                                                     |                                                                                                              |                                                                                                                            | How do you assess electronic exchange of documents?                                                                        | not satisfactory                   |
|    |                                                                     |                                                                                                              | Priority assignment to MoS services for procedures and dispatch                                                            | Is there a priority for MoS services?                                                                                      | yes                                |
|    |                                                                     | FAST CLEARING OF MOS SUBJECTS (TRANSPORT MEANS, CARGO AND PASSENGERS) FROM DOCUMENT AND PHYSICAL INSPECTIONS | Identify regular MoS customers and certify them in advance so that they can be easily cleared (create relevant data bases) | Is there a regulation for acceleration and simplification of regular MoS procedures?                                       | no                                 |
|    |                                                                     |                                                                                                              |                                                                                                                            | How do you assess the level of this service?                                                                               | good but improvements needed       |
|    |                                                                     | STREAMLINED DOCUMENT AND PHYSICAL INSPECTIONS BY CUSTOMS                                                     | Priority assigned to MoS cargo (special queue line)                                                                        | Is there a regulation for acceleration and simplification of regular MoS services?                                         | No                                 |
|    |                                                                     |                                                                                                              |                                                                                                                            | How do you assess the level of this service?                                                                               | good but improvements needed       |
|    |                                                                     |                                                                                                              |                                                                                                                            | Is there a special infrastructure (road, parking space, inspection point, etc.) for MoS services?                          | No                                 |
|    |                                                                     |                                                                                                              |                                                                                                                            | Do you find it useful?                                                                                                     | Yes                                |
|    |                                                                     | COORDINATED CUSTOMS AND SAFETY INSPECTIONS                                                                   | Coordination of routine inspections between different authorities                                                          | Is there coordination between all inspection services in order to accelerate necessary inspections?                        | yes                                |
|    |                                                                     |                                                                                                              |                                                                                                                            | Is it at a satisfactory level?                                                                                             | good, but improvements needed      |
|    | MoS SERVICE PROMOTION AND IMPLEMENTATION FROM ORIGIN TO DESTINATION | PROMOTIONAL ACTIVITIES                                                                                       | Promotional centres                                                                                                        | Is the promotion conducted by the operators or the regional body?                                                          | both are in charge of promotion    |
|    |                                                                     |                                                                                                              |                                                                                                                            | Is there a national/ regional body in charge of promotion? (IPC, SPC)                                                      | national                           |
|    |                                                                     |                                                                                                              |                                                                                                                            | How do you assess this system?                                                                                             | satisfactory                       |
|    |                                                                     |                                                                                                              | Promotion system                                                                                                           | How do you assess the level of promotion?                                                                                  | satisfactory                       |
|    |                                                                     |                                                                                                              |                                                                                                                            | How do you assess the importance of promotion for insurance of successful services?                                        | very valuable                      |
|    |                                                                     | SUSTAINABLE AND SYSTEMATIC BOTTLENECK MANAGEMENT                                                             |                                                                                                                            | Is the promotion conducted individually in the countries or for the complete route/service?                                | individually                       |
|    |                                                                     |                                                                                                              |                                                                                                                            | Is there a systematic identification of bottlenecks?                                                                       | yes, all                           |
|    |                                                                     |                                                                                                              |                                                                                                                            | Are all responsible bodies in the countries that use the service included? (Ministry, port authorities, Police, Customs..) | yes, all                           |
|    |                                                                     |                                                                                                              |                                                                                                                            | Are all subjects in the transport chain called for the identification?                                                     | yes                                |
|    |                                                                     |                                                                                                              |                                                                                                                            | How do you assess the success of this model?                                                                               | satisfactory                       |
|    |                                                                     | ICT SUPPORT                                                                                                  | Route plan                                                                                                                 | Is there a service database on the whole route?                                                                            | no                                 |
|    |                                                                     |                                                                                                              |                                                                                                                            | Is the update of the base satisfactory?                                                                                    | No                                 |
|    |                                                                     |                                                                                                              | Promotion of intermodality                                                                                                 | How do you assess usefulness of this tool?                                                                                 | important                          |
|    |                                                                     |                                                                                                              | Electronic data interchange                                                                                                | Is the exchange of documents on the whole route/service including the road assured?                                        | No                                 |

|    |                      |                       |                     |                                                                                                          |                                   |
|----|----------------------|-----------------------|---------------------|----------------------------------------------------------------------------------------------------------|-----------------------------------|
|    |                      |                       |                     | How do you assess usefulness of this service?                                                            | important                         |
|    |                      | QUALITY<br>MANAGEMENT |                     | Is there a system for assessment of the level of service quality from the starting point to destination? | No                                |
|    |                      |                       |                     |                                                                                                          |                                   |
| 7. | ECOLOGICAL<br>ASPECT | GENERAL               |                     | Are there complaints for environmental pollution related to MoS services?                                | No                                |
|    |                      |                       |                     | Is the functioning of MoS service resulting in significant environmental pollution (air, sea, land)?     | No                                |
|    |                      | PORT                  | WASTE<br>MANAGEMENT | Is there a system for waste, sewage and bilge disposal in the harbour?                                   | yes, but only some sorts of waste |

### Bottlenecks and missing links

#### Infrastructure:

- the road connection to port passing through the urban and inhabited area
- no direct connection terminal-highway
- railway network is inadequate capacity
- there is a road and pedestrian crossing on the railway
- road and railway crossings but railway has priority
- terminal roads are inadequate lane number and width
- vehicle parting space is insufficient
- terminal parting area cannot accept all possible vehicle dimensions
- non-existence of areas adequately arranged, with different areas for waiting and pre-embarkation and the interior traffic
- quay sea depth does not allow ship draught over 12 m
- non-existence of RO-LA ramp

#### Organisational:

- no computerized management system in the port (system that enables electronic exchange of documents between the drivers and terminal )
- tug obligated for ships over 500 BT
- Long time for response of custom authorities – 12-23 hours
- Long time for response of inspection authorities (veterinary, phytosanitary, etc.) – 12-23 hours
- not all ships are equipped with bow-thrusters
- electronic exchange of documents is partial
- need for additional procedures in order to accelerate and simplify procedures and work on terminal
- need for additional procedures in order to accelerate and simplify customs procedures
- need for additional coordination of all authorities and inspections

#### Additional services:

- non-existence of joint systematic promotion
- non-existence of systematic „bottleneck exercise“
- non-existence of IT route planner
- partial Quality Management implemented
- Waste reception – waste reception facilities inadequate

## Port of Split (Sjeverna luka)

|   |                                   |      |        |                                                                                                                            |              |
|---|-----------------------------------|------|--------|----------------------------------------------------------------------------------------------------------------------------|--------------|
| 1 | PORT<br>HINTERLAND<br>CONNECTIONS | ROAD | Safety |                                                                                                                            |              |
|   |                                   |      |        | Are there clearly marked routes for accessing the terminal and leaving the terminal in order to reach the highway network? | Satisfactory |

|                                       |                                                                      |                |                                                            |                                                                                                                                                     |                                                           |
|---------------------------------------|----------------------------------------------------------------------|----------------|------------------------------------------------------------|-----------------------------------------------------------------------------------------------------------------------------------------------------|-----------------------------------------------------------|
|                                       |                                                                      |                |                                                            | Is the connection between the terminal and highway network at a satisfactory safety level?                                                          | Satisfactory                                              |
|                                       |                                                                      |                |                                                            | What is the level of technical characteristics of the road that access terminal?                                                                    | Satisfactory                                              |
|                                       |                                                                      |                |                                                            |                                                                                                                                                     |                                                           |
|                                       |                                                                      |                | Access to road<br>(Way of connection from port to highway) | Is the connection passing through the urban and inhabited area?                                                                                     | yes, it is a nonsolvable problem                          |
|                                       |                                                                      |                |                                                            | Is there a direct access to the highway network?                                                                                                    | no                                                        |
|                                       |                                                                      |                |                                                            |                                                                                                                                                     |                                                           |
|                                       |                                                                      | RAIL           | Safety                                                     | Is the signalization on a satisfactory level?                                                                                                       | Satisfactory                                              |
|                                       |                                                                      |                |                                                            | Are the crossings satisfactory marked?                                                                                                              | Satisfactory                                              |
|                                       |                                                                      |                |                                                            | Is the railway line in full operational level                                                                                                       | Satisfactory                                              |
|                                       |                                                                      |                |                                                            | Is there a road and pedestrian crossing on the railway?                                                                                             | yes                                                       |
|                                       |                                                                      |                | Capacity                                                   | Is the current capacity of railway infrastructure satisfying?                                                                                       | Satisfactory                                              |
|                                       |                                                                      |                |                                                            | What is the status of the railway infrastructure to the terminal with the road network?                                                             | Partially but railway is a priority (traffic is stopped), |
|                                       |                                                                      |                |                                                            | Is it possible to dispatch the maximum allowed quantities of the train at once?                                                                     | No answer                                                 |
|                                       |                                                                      |                |                                                            | Is there a ramp for the loading/unloading of the trucks on the railway?                                                                             | no                                                        |
|                                       |                                                                      |                |                                                            |                                                                                                                                                     |                                                           |
|                                       |                                                                      |                | INLAND WATERWAYS                                           | Safety                                                                                                                                              | Is the safety level of the port access satisfactory?      |
|                                       |                                                                      | Capacity       |                                                            | Is the area of the port basin sufficient?                                                                                                           | Satisfactory                                              |
|                                       |                                                                      |                |                                                            | Is the capacity of the access to the terminal sufficient so the barges shouldn't be separated?                                                      | Satisfactory                                              |
|                                       |                                                                      | Access to road |                                                            | Is there a RO-RO ramp on the terminal?                                                                                                              | yes                                                       |
|                                       |                                                                      | o              | LAND-SIDE TERMINAL AND QUAY                                | INTERNAL PORT ROADS                                                                                                                                 | Wide and number of lanes                                  |
| Signed post                           | Is the terminal roads adequately marked with traffic signalization?  |                |                                                            |                                                                                                                                                     | Satisfactory                                              |
| Lighting                              | Are the terminal roads satisfactorily illuminated during night time? |                |                                                            |                                                                                                                                                     | Satisfactory                                              |
| Road quality (maintanance)            | Are the terminal roads satisfactorily maintained?                    |                |                                                            |                                                                                                                                                     | Satisfactory                                              |
| Dedicated parking area                | Clear identification of roads from parking area                      |                |                                                            |                                                                                                                                                     | Yes                                                       |
| MoS TERMINAL AND QUEY CHARACTERIS TIC | Parking signposting                                                  |                |                                                            | Parking spaces are adequately signposted for identification                                                                                         | Satisfactory                                              |
|                                       | Parking capacity                                                     |                |                                                            | Is the capacity of a parking lot sufficient?                                                                                                        | Very satisfactory                                         |
|                                       | Parking characteristics                                              |                |                                                            | Could the parking space accept all possible vehicle dimensions?                                                                                     | Very satisfactory                                         |
|                                       | Terminal organization                                                |                |                                                            | Adequately arranged, with different areas for waiting and pre-embarkation and the interior traffic areas                                            | yes                                                       |
|                                       | Management system                                                    |                |                                                            | Availability of computerized management system in the port (system that enables electronic exchange of documents between the drivers and terminal ) | No answer                                                 |
|                                       | EXISTING auxiliary services                                          |                |                                                            | Allow for an auxiliary services area close to the vehicles                                                                                          | Satisfactory                                              |
| LOADING/UN LOADIG ACTIVITIES AND      | Guaranteed stevedoring service                                       |                |                                                            | Guaranteed stevedoring service<br>24 hours / day - 365 days / year                                                                                  | yes                                                       |
|                                       | Stevedoring flexibility                                              |                |                                                            | Guaranteed flexibility in the composition of stevedoring                                                                                            | yes                                                       |

|   |                            |                                                                                                                         |                                                                            |                                                                                                     |                              |
|---|----------------------------|-------------------------------------------------------------------------------------------------------------------------|----------------------------------------------------------------------------|-----------------------------------------------------------------------------------------------------|------------------------------|
|   |                            | STEVEDERING                                                                                                             |                                                                            | crews and handling equipment to absorb demand peaks in loading / unloading services                 |                              |
|   |                            |                                                                                                                         | Cargo handling                                                             | Possibility for Port Authority to license more than one cargo handling operators within the port    | yes                          |
|   |                            |                                                                                                                         |                                                                            |                                                                                                     |                              |
|   |                            | FAST ACCESS TO THE MOORING QUAY                                                                                         |                                                                            | Terminal adjacent to, or close to the mooring quay                                                  | yes                          |
|   |                            | TERMINAL / QUAY SECURITY                                                                                                |                                                                            | Is there specific security measures related to MoS operation in accordance with ISPS Code?          | No answer                    |
|   |                            | SAFE VEHICLE EMBARKATION / DISEMBARKATION                                                                               |                                                                            | Certified RO-RO ramp service provider                                                               | yes                          |
|   |                            | FAST SAFETY AND SECURITY INSPECTIONS                                                                                    | Data bases of vehicles / drivers                                           | Data bases of vehicles / drivers created in parallel with application of a risk management system   | Yes, under customs authority |
| 3 | SEA-SIDE TERMINAL AND QUAY |                                                                                                                         |                                                                            |                                                                                                     |                              |
|   |                            | FAST, SAFE AND GUARANTEED SEA ACCESS OF THE TERMINAL / QUAY BY MOS VESSELS                                              | Existence of VTMISS                                                        | Does VTMISS exists and is it in the function?                                                       | yes                          |
|   |                            |                                                                                                                         | Sea-access characteristics                                                 | Is the depth of the access to the shore and of the very shore sufficient for the biggest MoS ships? | 6-10 m                       |
|   |                            |                                                                                                                         | Non-operational time                                                       | How much time a year is the terminal out of function for bad weather?                               | No answer                    |
|   |                            | MINIMISE WAITING TIMES FOR SERVICES PROVISION TO MOS VESSELS WITHIN PORT (MOORING, TUGGING, PILOTAGE, WASTE COLLECTION) | MoS service as priority                                                    | Is the MoS service marked and treated as a priority in the port/terminal?                           | No                           |
|   |                            |                                                                                                                         | Pilotage Exemption Certificate for regular MoS ships                       | Is there a liability exemption for the pilots on MoS ships that regularly access the port?          | yes                          |
|   |                            |                                                                                                                         | Tug Obligation for regular MoS ships?                                      | Is there an exemption of tug usage for MoS ships that regularly access the port?                    | no                           |
|   |                            |                                                                                                                         | Response time                                                              | PILOT - Time required: from the request to reaction?                                                | No                           |
|   |                            |                                                                                                                         |                                                                            | Needed hours for inspection authorities (veterinary, phitosanitary, etc.)                           | No answer                    |
|   |                            |                                                                                                                         | Coordination between service operator and MoS terminal                     | How would you assess the cooperation between the terminal and an agent?                             | Satisfactory                 |
|   |                            |                                                                                                                         |                                                                            | How would you assess the cooperation between the terminal and a ship?                               | Satisfactory                 |
| 4 | SHIPPING OPERATIONS        | REGULAR, RELIABLE AND CONTINUOUS SHIPPING SERVICES                                                                      | Service frequency and capacity                                             | Are the frequencies and a capacity satisfactory?                                                    | yes                          |
|   |                            |                                                                                                                         | Vessel departure / arrival times predetermined and advertised              | Are the arrival/departure tables announced?                                                         | yes but not for all services |
|   |                            |                                                                                                                         | No interruption allowed throughout the year                                | Are there deviations from the tables?                                                               | yes                          |
|   |                            | RELIABLE SHIPPING VESSELS                                                                                               | Vessel compliance with all IMO safety / security / reliability regulations | What is the number of detention of MoS ships regarding PSC inspection in the period of last year?   | No answer                    |
|   |                            |                                                                                                                         |                                                                            |                                                                                                     |                              |

|    |                                                                     |                                                                                                                         |                                                                                                                                                   |                                                                                                     |                                                                     |
|----|---------------------------------------------------------------------|-------------------------------------------------------------------------------------------------------------------------|---------------------------------------------------------------------------------------------------------------------------------------------------|-----------------------------------------------------------------------------------------------------|---------------------------------------------------------------------|
|    |                                                                     |                                                                                                                         | Bow-thruster availability                                                                                                                         | Do they have adequate bow-thrusters?                                                                | yes                                                                 |
|    |                                                                     |                                                                                                                         | SAFETY OF PERSONNEL AND CARGO IN SHIPPING                                                                                                         | Compliance with Directives on means of securing cargo                                               | Is there lack of compliance with safety regulations observed?<br>No |
| 5  | INFORMATION EXCHANGE AND DOCUMENTATION                              | EXCHANGE OF REAL TIME INFORMATION BETWEEN MOS SERVICE STAKEHOLDERS REGARDING DOCUMENTATION OF THE PROVIDED MOS SERVICES | AVAILABILITY OF SUITABLE ICT SYSTEM FOR REMOTE REAL TIME INFORMATION EXCHANGE (ELECTRONIC DOCUMENT TRANSFER) BETWEEN ALL MOS SERVICE STAKEHOLDERS | Is the documentation exchanged electronically?                                                      | partial exchange of some documents                                  |
|    |                                                                     |                                                                                                                         | Coordination between ports of origin and destination                                                                                              | Is there an exchange of documents between starting points and destination?                          | partial exchange of some documents                                  |
|    |                                                                     |                                                                                                                         | Communication of cargo documentation well in advance of ship arrival in port                                                                      | Is the documentation exchanged electronically?                                                      | partial exchange of some documents                                  |
|    |                                                                     |                                                                                                                         |                                                                                                                                                   | How do you assess electronic exchange of documents?                                                 | satisfactory                                                        |
|    |                                                                     |                                                                                                                         | Priority assignment to MoS services for procedures and dispatch                                                                                   | Is there a priority for MoS services?                                                               | No                                                                  |
|    |                                                                     | FAST CLEARING OF MOS SUBJECTS (TRANSPORT MEANS, CARGO AND PASSENGERS) FROM DOCUMENT AND PHYSICAL INSPECTIONS            | Identify regular MoS customers and certify them in advance so that they can be easily cleared (create relevant data bases)                        | Is there a regulation for acceleration and simplification of regular MoS procedures?                | No                                                                  |
|    |                                                                     |                                                                                                                         |                                                                                                                                                   | How do you assess the level of this service?                                                        | not satisfactory                                                    |
|    |                                                                     | STREAMLINED DOCUMENT AND PHYSICAL INSPECTIONS BY CUSTOMS                                                                | Priority assigned to MoS cargo (special queue line)                                                                                               | Is there a regulation for acceleration and simplification of regular MoS services?                  | No                                                                  |
|    |                                                                     |                                                                                                                         |                                                                                                                                                   | How do you assess the level of this service?                                                        | not satisfactory                                                    |
|    |                                                                     |                                                                                                                         |                                                                                                                                                   | Is there a special infrastructure (road, parking space, inspection point, etc.) for MoS services?   | No                                                                  |
|    |                                                                     |                                                                                                                         |                                                                                                                                                   | Do you find it useful?                                                                              | yes                                                                 |
|    |                                                                     | COORDINATED CUSTOMS AND SAFETY INSPECTIONS                                                                              | Coordination of routine inspections between different authorities                                                                                 | Is there coordination between all inspection services in order to accelerate necessary inspections? | No                                                                  |
|    |                                                                     |                                                                                                                         |                                                                                                                                                   | Is it at a satisfactory level?                                                                      | not satisfactory                                                    |
| 6. | MoS SERVICE PROMOTION AND IMPLEMENTATION FROM ORIGIN TO DESTINATION | PROMOTIONAL ACTIVITIES                                                                                                  | Promotional centres                                                                                                                               | Is the promotion conducted by the operators or the regional body?                                   | operators                                                           |
|    |                                                                     |                                                                                                                         |                                                                                                                                                   | Is there a national/ regional body in charge of promotion? (IPC, SPC)                               | national                                                            |
|    |                                                                     |                                                                                                                         |                                                                                                                                                   | How do you assess this system?                                                                      | not satisfactory                                                    |
|    |                                                                     |                                                                                                                         | Promotion system                                                                                                                                  | How do you assess the level of promotion?                                                           | not satisfactory                                                    |

|    |                   |                                                  |                            |                                                                                                                            |                                   |
|----|-------------------|--------------------------------------------------|----------------------------|----------------------------------------------------------------------------------------------------------------------------|-----------------------------------|
|    |                   |                                                  |                            | How do you assess the importance of promotion for insurance of successful services?                                        | important                         |
|    |                   |                                                  |                            | Is the promotion conducted individually in the countries or for the complete route/service?                                | individually                      |
|    |                   | SUSTAINABLE AND SYSTEMATIC BOTTLENECK MANAGEMENT |                            | Is there a systematic identification of bottlenecks?                                                                       | No                                |
|    |                   |                                                  |                            | Are all responsible bodies in the countries that use the service included? (Ministry, port authorities, Police, Customs..) | No                                |
|    |                   |                                                  |                            | Are all subjects in the transport chain called for the identification?                                                     | No answer                         |
|    |                   |                                                  |                            | How do you assess the success of this model?                                                                               | not satisfactory                  |
|    |                   | ICT SUPPORT                                      | Route plan                 | Is there a service database on the whole route?                                                                            | No                                |
|    |                   |                                                  |                            | Is the update of the base satisfactory?                                                                                    | No                                |
|    |                   |                                                  | Promotion of intermodality | How do you assess usefulness of this tool?                                                                                 | not satisfactory                  |
|    |                   |                                                  |                            | Is the exchange of documents on the whole route/service including the road assured?                                        | No                                |
|    |                   |                                                  |                            | How do you assess usefulness of this service?                                                                              | important                         |
|    |                   | QUALITY MANAGEMENT                               |                            | Is there a system for assessment of the level of service quality from the starting point to destination?                   | No                                |
|    |                   |                                                  |                            |                                                                                                                            |                                   |
| 7. | ECOLOGICAL ASPECT | GENERAL                                          |                            | Are there complaints for environmental pollution related to MoS services?                                                  | No                                |
|    |                   |                                                  |                            | Is the functioning of MoS service resulting in significant environmental pollution (air, sea, land)?                       | yes                               |
|    |                   | PORT                                             | WASTE MANAGEMENT           | Is there a system for waste, sewage and bilge disposal in the harbour?                                                     | yes, but only some sorts of waste |

### Bottlenecks and missing links

#### Infrastructure:

- the road connection to port passing through the urban and inhabited area
- no direct connection terminal-highway
- railway network is inadequate capacity
- there is a road and pedestrian crossing on the railway
- road and railway crossings but railway has priority
- no RO-LA ramp
- quay sea depth does not allow ship draught over 10 m

#### Organisational:

- tug obligated for ships over 500 BT
- electronic exchange of documents is partial
- no computerized management system in the port (system that enables electronic exchange of documents between the drivers and terminal )

#### Additional services:

- non-existence of joint systematic promotion
- non-existence of systematic „bottleneck exercise“
- non-existence of IT route planner
- partial Quality Management implemented
- Waste reception – waste reception facilities inadequate

## Port of Ploče

|   |  |      |        |  |  |
|---|--|------|--------|--|--|
| 1 |  | ROAD | Safety |  |  |
|---|--|------|--------|--|--|

|   |                                   |                                                   |                                                            |                                                                                                                                                     |                                                           |
|---|-----------------------------------|---------------------------------------------------|------------------------------------------------------------|-----------------------------------------------------------------------------------------------------------------------------------------------------|-----------------------------------------------------------|
|   | PORT<br>HINTERLAND<br>CONNECTIONS |                                                   |                                                            | Are there clearly marked routes for accessing the terminal and leaving the terminal in order to reach the highway network?                          | Satisfactory                                              |
|   |                                   |                                                   |                                                            | Is the connection between the terminal and highway network at a satisfactory safety level?                                                          | Satisfactory                                              |
|   |                                   |                                                   |                                                            | What is the level of technical characteristics of the road that access terminal?                                                                    | Satisfactory                                              |
|   |                                   |                                                   |                                                            |                                                                                                                                                     |                                                           |
|   |                                   |                                                   | Access to road<br>(Way of connection from port to highway) | Is the connection passing through the urban and inhabited area?                                                                                     | yes, (existence of plans for solving                      |
|   |                                   |                                                   |                                                            | Is there a direct access to the highway network?                                                                                                    | No                                                        |
|   |                                   | RAIL                                              | Safety                                                     | Is the signalization on a satisfactory level?                                                                                                       | Satisfactory                                              |
|   |                                   |                                                   |                                                            | Are the crossings satisfactory marked?                                                                                                              | Satisfactory                                              |
|   |                                   |                                                   |                                                            | Is the railway line in full operational level                                                                                                       | Satisfactory                                              |
|   |                                   |                                                   |                                                            | Is there a road and pedestrian crossing on the railway?                                                                                             | Yes                                                       |
|   |                                   |                                                   | Capacity                                                   | Is the current capacity of railway infrastructure satisfying?                                                                                       | Satisfactory                                              |
|   |                                   |                                                   |                                                            | What is the status of the railway infrastructure to the terminal with the road network?                                                             | Partially but railway is a priority (traffic is stopped), |
|   |                                   |                                                   |                                                            | Is it possible to dispatch the maximum allowed quantities of the train at once?                                                                     | No                                                        |
|   |                                   |                                                   |                                                            | Is there a ramp for the loading/unloading of the trucks on the railway?                                                                             | No                                                        |
|   |                                   |                                                   |                                                            |                                                                                                                                                     |                                                           |
|   |                                   | INLAND<br>WATERWAYS                               | Safety                                                     | Is the safety level of the port access satisfactory?                                                                                                | Satisfactory                                              |
|   |                                   |                                                   | Capacity                                                   | Is the area of the port basin sufficient?                                                                                                           | Very satisfactory                                         |
|   |                                   |                                                   |                                                            | Is the capacity of the access to the terminal sufficient so the barges shouldn't be separated?                                                      | No answer                                                 |
|   |                                   |                                                   | Access to road                                             | Is there a RO-RO ramp on the terminal?                                                                                                              | yes                                                       |
| o | LAND-SIDE<br>TERMINAL AND<br>QUAY | INTERNAL<br>PORT ROADS                            | Wide and number of lanes                                   | Is the number of tracks on terminal roads sufficient and is their width satisfactory?                                                               | Satisfactory                                              |
|   |                                   |                                                   | Signed post                                                | Is the terminal roads adequately marked with traffic signalization?                                                                                 | Poor respectively                                         |
|   |                                   |                                                   | Lighting                                                   | Are the terminal roads satisfactorily illuminated during night time?                                                                                | Satisfactory                                              |
|   |                                   |                                                   | Road quality (maintenance)                                 | Are the terminal roads satisfactorily maintained?                                                                                                   | Satisfactory                                              |
|   |                                   |                                                   | Dedicated parking area                                     | Clear identification of roads from parking area                                                                                                     | No                                                        |
|   |                                   | MoS<br>TERMINAL<br>AND QUEY<br>CHARACTERIS<br>TIC | Parking signposting                                        | Parking spaces are adequately signposted for identification                                                                                         | Very poor/Non-existent                                    |
|   |                                   |                                                   | Parking capacity                                           | Is the capacity of a parking lot sufficient?                                                                                                        | Poor respectively                                         |
|   |                                   |                                                   | Parking characteristics                                    | Could the parking space accept all possible vehicle dimensions?                                                                                     | Satisfactory                                              |
|   |                                   |                                                   | Terminal organization                                      | Adequately arranged, with different areas for waiting and pre-embarkation and the interior traffic areas                                            | No                                                        |
|   |                                   |                                                   | Management system                                          | Availability of computerized management system in the port (system that enables electronic exchange of documents between the drivers and terminal ) | Very poor/Non-existent                                    |
|   |                                   |                                                   | EXISTING auxiliary services                                | Allow for an auxiliary services area close to the vehicles                                                                                          | Very poor/Non-existent                                    |

|   |                            |                                                                                                                         |                                                               |                                                                                                                                              |                                                    |
|---|----------------------------|-------------------------------------------------------------------------------------------------------------------------|---------------------------------------------------------------|----------------------------------------------------------------------------------------------------------------------------------------------|----------------------------------------------------|
|   |                            | LOADING/UNLOADING ACTIVITIES AND STEVEDORING                                                                            | Guaranteed stevedoring service                                | Guaranteed stevedoring service<br>24 hours / day - 365 days / year                                                                           | yes                                                |
|   |                            |                                                                                                                         | Stevedoring flexibility                                       | Guaranteed flexibility in the composition of stevedoring crews and handling equipment to absorb demand peaks in loading / unloading services | Satisfactory                                       |
|   |                            |                                                                                                                         | Cargo handling                                                | Possibility for Port Authority to license more than one cargo handling operators within the port                                             | Yes                                                |
|   |                            |                                                                                                                         |                                                               |                                                                                                                                              |                                                    |
|   |                            | FAST ACCESS TO THE MOORING QUAY                                                                                         |                                                               | Terminal adjacent to, or close to the mooring quay                                                                                           | Yes                                                |
|   |                            | TERMINAL / QUAY SECURITY                                                                                                |                                                               | Is there specific security measures related to MoS operation in accordance with ISPS Code?                                                   | Yes                                                |
|   |                            | SAFE VEHICLE EMBARKATION / DISEMBARKATION                                                                               |                                                               | Certified RO-RO ramp service provider                                                                                                        | Yes                                                |
|   |                            | FAST SAFETY AND SECURITY INSPECTIONS                                                                                    | Data bases of vehicles / drivers                              | Data bases of vehicles / drivers created in parallel with application of a risk management system                                            | Yes, under police authority                        |
| 3 | SEA-SIDE TERMINAL AND QUAY |                                                                                                                         |                                                               |                                                                                                                                              |                                                    |
|   |                            | FAST, SAFE AND GUARANTEED SEA ACCESS OF THE TERMINAL / QUAY BY MOS VESSELS                                              | Existence of VTMISS                                           | Does VTMISS exist and is it in the function?                                                                                                 | Partially under governmental authorities           |
|   |                            |                                                                                                                         | Sea-access characteristics                                    | Is the depth of the access to the shore and of the very shore sufficient for the biggest MoS ships?                                          | 6-10 meters                                        |
|   |                            |                                                                                                                         | Non-operational time                                          | How much time a year is the terminal out of function for bad weather?                                                                        | below 2 days                                       |
|   |                            | MINIMISE WAITING TIMES FOR SERVICES PROVISION TO MOS VESSELS WITHIN PORT (MOORING, TUGGING, PILOTAGE, WASTE COLLECTION) | MoS service as priority                                       | Is the MoS service marked and treated as a priority in the port/terminal?                                                                    | Yes                                                |
|   |                            |                                                                                                                         | Pilotage Exemption Certificate for regular MoS ships          | Is there a liability exemption for the pilots on MoS ships that regularly access the port?                                                   | yes                                                |
|   |                            |                                                                                                                         | Tug Obligation for regular MoS ships?                         | Is there an exemption of tug usage for MoS ships that regularly access the port?                                                             | No answer                                          |
|   |                            |                                                                                                                         | Response time                                                 | PILOT - Time required: from the request to reaction?                                                                                         | Below 3 hours                                      |
|   |                            |                                                                                                                         |                                                               | Needed hours for inspection authorities (veterinary, phytosanitary, etc.)                                                                    | From 6 to 3 hours,                                 |
|   |                            |                                                                                                                         | Coordination between service operator and MoS terminal        | How would you assess the cooperation between the terminal and an agent?                                                                      | Satisfactory                                       |
|   |                            |                                                                                                                         |                                                               | How would you assess the cooperation between the terminal and a ship?                                                                        | Satisfactory                                       |
|   |                            |                                                                                                                         |                                                               |                                                                                                                                              |                                                    |
| 4 | SHIPPING OPERATIONS        | REGULAR, RELIABLE AND CONTINUOUS SHIPPING SERVICES                                                                      | Service frequency and capacity                                | Are the frequencies and a capacity satisfactory?                                                                                             | satisfactory capacity but insufficient frequencies |
|   |                            |                                                                                                                         | Vessel departure / arrival times predetermined and advertised | Are the arrival/departure tables announced?                                                                                                  | no                                                 |
|   |                            |                                                                                                                         |                                                               |                                                                                                                                              |                                                    |

|   |  |                                                                                                                         |                                                                                                                                                   |                                                                                                     |                                        |
|---|--|-------------------------------------------------------------------------------------------------------------------------|---------------------------------------------------------------------------------------------------------------------------------------------------|-----------------------------------------------------------------------------------------------------|----------------------------------------|
| 5 |  |                                                                                                                         | No interruption allowed throughout the year                                                                                                       | Are there deviations from the tables?                                                               | no                                     |
|   |  | RELIABLE SHIPPING VESSELS                                                                                               | Vessel compliance with all IMO safety / security / reliability regulations                                                                        | What is the number of detention of MoS ships regarding PSC inspection in the period of last year?   | No answer                              |
|   |  |                                                                                                                         | Bow-thruster availability                                                                                                                         | Do they have adequate bow-thrusters?                                                                | not all                                |
|   |  | SAFETY OF PERSONNEL AND CARGO IN SHIPPING                                                                               |                                                                                                                                                   |                                                                                                     |                                        |
|   |  |                                                                                                                         | Compliance with Directives on means of securing cargo                                                                                             | Is there lack of compliance with safety regulations observed?                                       | yes but in less than 10 % of the cases |
|   |  | EXCHANGE OF REAL TIME INFORMATION BETWEEN MOS SERVICE STAKEHOLDERS REGARDING DOCUMENTATION OF THE PROVIDED MOS SERVICES | AVAILABILITY OF SUITABLE ICT SYSTEM FOR REMOTE REAL TIME INFORMATION EXCHANGE (ELECTRONIC DOCUMENT TRANSFER) BETWEEN ALL MOS SERVICE STAKEHOLDERS | Is the documentation exchanged electronically?                                                      | no                                     |
|   |  |                                                                                                                         | Coordination between ports of origin and destination                                                                                              | Is there an exchange of documents between starting points and destination?                          | partial exchange of some documents     |
|   |  |                                                                                                                         | Communication of cargo documentation well in advance of ship arrival in port                                                                      | Is the documentation exchanged electronically?                                                      |                                        |
|   |  |                                                                                                                         |                                                                                                                                                   | How do you assess electronic exchange of documents?                                                 | Not satisfactory                       |
|   |  |                                                                                                                         | Priority assignment to MoS services for procedures and dispatch                                                                                   | Is there a priority for MoS services?                                                               | Yes                                    |
|   |  | FAST CLEARING OF MOS SUBJECTS (TRANSPORT MEANS, CARGO AND PASSENGERS) FROM DOCUMENT AND PHYSICAL INSPECTIONS            | Identify regular MoS customers and certify them in advance so that they can be easily cleared (create relevant data bases)                        | Is there a regulation for acceleration and simplification of regular MoS procedures?                | yes                                    |
|   |  |                                                                                                                         |                                                                                                                                                   | How do you assess the level of this service?                                                        | not good                               |
|   |  | STREAMLINED DOCUMENT AND PHYSICAL INSPECTIONS BY CUSTOMS                                                                | Priority assigned to MoS cargo (special queue line)                                                                                               | Is there a regulation for acceleration and simplification of regular MoS services?                  | yes                                    |
|   |  |                                                                                                                         |                                                                                                                                                   | How do you assess the level of this service?                                                        | good but improvements needed           |
|   |  |                                                                                                                         |                                                                                                                                                   | Is there a special infrastructure (road, parking space, inspection point, etc.) for MoS services?   | yes                                    |
|   |  |                                                                                                                         |                                                                                                                                                   | Do you find it useful?                                                                              | yes                                    |
|   |  |                                                                                                                         | Coordination of routine                                                                                                                           | Is there coordination between all inspection services in order to accelerate necessary inspections? | yes among some                         |

|    |                                                                     |                                                  |                                           |                                                                                                                            |                                   |
|----|---------------------------------------------------------------------|--------------------------------------------------|-------------------------------------------|----------------------------------------------------------------------------------------------------------------------------|-----------------------------------|
|    |                                                                     | COORDINATE D CUSTOMS AND SAFETY INSPECTIONS      | inspections between different authorities | Is it at a satisfactory level?                                                                                             | good, but improvements needed     |
| 6. | MoS SERVICE PROMOTION AND IMPLEMENTATION FORM ORIGIN TO DESTINATION | PROMOTIONAL ACTIVITIES                           | Promotional centres                       | Is the promotion conducted by the operators or the regional body?                                                          | there is no promotion             |
|    |                                                                     |                                                  |                                           | Is there a national/ regional body in charge of promotion? (IPC, SPC)                                                      | Yes                               |
|    |                                                                     |                                                  |                                           | How do you assess this system?                                                                                             | not good                          |
|    |                                                                     |                                                  | Promotion system                          | How do you assess the level of promotion?                                                                                  | not good                          |
|    |                                                                     |                                                  |                                           | How do you assess the importance of promotion for insurance of successful services?                                        | very valuable                     |
|    |                                                                     |                                                  |                                           | Is the promotion conducted individually in the countries or for the complete route/service?                                | individually                      |
|    |                                                                     | SUSTAINABLE AND SYSTEMATIC BOTTLENECK MANAGEMENT |                                           | Is there a systematic identification of bottlenecks?                                                                       | no                                |
|    |                                                                     |                                                  |                                           | Are all responsible bodies in the countries that use the service included? (Ministry, port authorities, Police, Customs..) | No                                |
|    |                                                                     |                                                  |                                           | Are all subjects in the transport chain called for the identification?                                                     | No                                |
|    |                                                                     |                                                  |                                           | How do you assess the success of this model?                                                                               | not good                          |
|    |                                                                     | ICT SUPPORT                                      | Route plan                                | Is there a service database on the whole route?                                                                            | No                                |
|    |                                                                     |                                                  |                                           | Is the update of the base satisfactory?                                                                                    | No                                |
|    |                                                                     |                                                  | Promotion of intermodality                | How do you assess usefulness of this tool?                                                                                 | No answer                         |
|    |                                                                     |                                                  | Electronic data interchange               | Is the exchange of documents on the whole route/service including the road assured?                                        | no                                |
|    |                                                                     |                                                  |                                           | How do you assess usefulness of this service?                                                                              | little use                        |
|    |                                                                     | QUALITY MANAGEMENT                               |                                           | Is there a system for assessment of the level of service quality from the starting point to destination?                   | No                                |
|    |                                                                     |                                                  |                                           |                                                                                                                            |                                   |
| 7. | ECOLOGICAL ASPECT                                                   | GENERAL                                          |                                           | Are there complaints for environmental pollution related to MoS services?                                                  | Rarely                            |
|    |                                                                     |                                                  |                                           | Is the functioning of MoS service resulting in significant environmental pollution (air, sea, land)?                       | No                                |
|    |                                                                     | PORT                                             | WASTE MANAGEMENT                          | Is there a system for waste, sewage and bilge disposal in the harbour?                                                     | yes, but only some sorts of waste |

### Bottlenecks and missing links

#### Infrastructure:

- the road connection to port passing through the urban and inhabited area (existence of solving plan)
- no direct connection terminal-highway (will be done in 2013)
- there is a road and pedestrian crossing on the railway
- road and railway crossings but railway has priority
- railway infrastructure in port does not have satisfactory capacity
- no RO-LA ramp
- parking spaces at terminal are not adequately signposted
- parking capacity at terminal is not adequate
- non-existence of areas adequately arranged, with different areas for waiting and pre-embarkation and the interior traffic (will be done till end of 2015 – 8.6 M€)
- auxiliary service area not close to the vehicles

#### Organisational:

- arrival/departure tables are not announced
- electronic exchange of documents is partial (2013)

#### Additional services:

- non-existence of join systematic promotion
- non-existence of systematic „bottleneck exercise”
- non-existence of IT route planner
- partial Quality Management implemented
- Waste reception – waste reception facilities inadequate

## Port of Dubrovnik

|   |                                   |                        |                                                            |                                                                                                                            |                                                 |
|---|-----------------------------------|------------------------|------------------------------------------------------------|----------------------------------------------------------------------------------------------------------------------------|-------------------------------------------------|
| 1 | PORT<br>HINTERLAND<br>CONNECTIONS | ROAD                   | Safety                                                     |                                                                                                                            |                                                 |
|   |                                   |                        |                                                            | Are there clearly marked routes for accessing the terminal and leaving the terminal in order to reach the highway network? | Poor respectively                               |
|   |                                   |                        |                                                            | Is the connection between the terminal and highway network at a satisfactory safety level?                                 | Satisfactory                                    |
|   |                                   |                        |                                                            | What is the level of technical characteristics of the road that access terminal?                                           | Poor respectively                               |
|   |                                   |                        |                                                            |                                                                                                                            |                                                 |
|   |                                   | RAIL                   | Access to road<br>(Way of connection from port to highway) | Is the connection passing through the urban and inhabited area?                                                            | yes, (existence of plans for solving)           |
|   |                                   |                        |                                                            | Is there a direct access to the highway network?                                                                           | No                                              |
|   |                                   |                        | Safety                                                     | Is the signalization on a satisfactory level?                                                                              | No answer                                       |
|   |                                   |                        |                                                            | Are the crossings satisfactory marked?                                                                                     | No answer                                       |
|   |                                   |                        |                                                            | Is the railway line in full operational level                                                                              | no railway infrastructure                       |
|   |                                   |                        |                                                            | Is there a road and pedestrian crossing on the railway?                                                                    | No answer                                       |
|   |                                   |                        | Capacity                                                   | Is the current capacity of railway infrastructure satisfying?                                                              | No answer                                       |
|   |                                   |                        |                                                            | What is the status of the railway infrastructure to the terminal with the road network?                                    | No answer                                       |
|   |                                   |                        |                                                            | Is it possible to dispatch the maximum allowed quantities of the train at once?                                            | No answer                                       |
|   |                                   |                        |                                                            | Is there a ramp for the loading/unloading of the trucks on the railway?                                                    | No answer                                       |
|   |                                   |                        |                                                            |                                                                                                                            |                                                 |
|   |                                   | INLAND<br>WATERWAYS    | Safety                                                     | Is the safety level of the port access satisfactory?                                                                       | No answer                                       |
|   |                                   |                        | Capacity                                                   | Is the area of the port basin sufficient?                                                                                  | No answer                                       |
|   |                                   |                        |                                                            | Is the capacity of the access to the terminal sufficient so the barges shouldn't be separated?                             | No answer                                       |
|   |                                   |                        | Access to road                                             | Is there a RO-RO ramp on the terminal?                                                                                     | yes, but not in the adequate state and capacity |
| o | LAND-SIDE<br>TERMINAL AND<br>QUAY | INTERNAL<br>PORT ROADS | Wide and number of lanes                                   | Is the number of tracks on terminal roads sufficient and is their width satisfactory?                                      | Poor respectively                               |
|   |                                   |                        | Signed post                                                | Is the terminal roads adequately marked with traffic signalization?                                                        | Poor respectively                               |
|   |                                   |                        | Lighting                                                   | Are the terminal roads satisfactorily illuminated during night time?                                                       | Satisfactory                                    |
|   |                                   |                        | Road quality (maintanance)                                 | Are the terminal roads satisfactorily maintained?                                                                          | Satisfactory                                    |
|   |                                   |                        | Dedicated parking area                                     | Clear identification of roads from parking area                                                                            | No                                              |

|   |                                  |                                                                                                                                              |                                                               |                                                                                                                                                           |                            |
|---|----------------------------------|----------------------------------------------------------------------------------------------------------------------------------------------|---------------------------------------------------------------|-----------------------------------------------------------------------------------------------------------------------------------------------------------|----------------------------|
|   |                                  | MoS<br>TERMINAL<br>AND QUEY<br>CHARACTERIS<br>TIC                                                                                            | Parking<br>signposting                                        | Parking spaces are adequately signposted for<br>identification                                                                                            | Satisfactory               |
|   |                                  |                                                                                                                                              | Parking capacity                                              | Is the capacity of a parking lot sufficient?                                                                                                              | Very poor/Non-<br>existent |
|   |                                  |                                                                                                                                              | Parking<br>characteristics                                    | Could the parking space accept all possible vehicle<br>dimensions?                                                                                        | Satisfactory               |
|   |                                  |                                                                                                                                              | Terminal<br>organization                                      | Adequately arranged, with different areas for waiting<br>and pre-embarkation and the interior traffic areas                                               | No                         |
|   |                                  |                                                                                                                                              | Management<br>system                                          | Availability of computerized management system in<br>the port (system that enables electronic exchange of<br>documents between the drivers and terminal ) | Very poor/Non-<br>existent |
|   |                                  |                                                                                                                                              | EXISTING auxiliary<br>services                                | Allow for an auxiliary services area close to the vehicles                                                                                                | Very poor/Non-<br>existent |
|   |                                  | LOADING/UN<br>LOADING<br>ACTIVITIES<br>AND<br>STEVEDORIN<br>G                                                                                | Guaranteed<br>stevedoring<br>service                          | Guaranteed stevedoring service<br>24 hours / day - 365 days / year                                                                                        | Yes                        |
|   |                                  |                                                                                                                                              | Stevedoring<br>flexibility                                    | Guaranteed flexibility in the<br>composition of stevedoring<br>crews and handling equipment<br>to absorb demand peaks in<br>loading / unloading services  | Satisfactory               |
|   |                                  |                                                                                                                                              | Cargo handling                                                | Possibility for Port Authority to<br>license more than one cargo handling<br>operators within the port                                                    | No                         |
|   |                                  |                                                                                                                                              |                                                               |                                                                                                                                                           |                            |
|   |                                  | FAST ACCESS<br>TO THE<br>MOORING<br>QUAY                                                                                                     |                                                               | Terminal adjacent to, or close to the mooring quay                                                                                                        | Yes                        |
|   |                                  | TERMINAL /<br>QUAY<br>SECURITY                                                                                                               |                                                               | Is there specific security measures related to MoS<br>operation in accordance with ISPS Code?                                                             | Yes                        |
|   |                                  | SAFE VEHICLE<br>EMBARKATIO<br>N /<br>DISEMBARKA<br>TION                                                                                      |                                                               | Certified RO-RO ramp service provider                                                                                                                     | No answer                  |
|   |                                  | FAST SAFETY<br>AND<br>SECURITY<br>INSPECTIONS                                                                                                | Data bases of<br>vehicles / drivers                           | Data bases of vehicles / drivers<br>created in parallel with application of a risk<br>management system                                                   | No                         |
| 3 | SEA-SIDE<br>TERMINAL AND<br>QUAY |                                                                                                                                              |                                                               |                                                                                                                                                           |                            |
|   |                                  | FAST, SAFE<br>AND<br>GUARANTEED<br>SEA<br>ACCESS OF<br>THE<br>TERMINAL /<br>QUAY<br>BY MOS<br>VESSELS                                        | Existence of<br>VTMIS                                         | Does VTMIS exists and is it in the function?                                                                                                              | No                         |
|   |                                  |                                                                                                                                              | Sea-access<br>characteristics                                 | Is the depth of the access to the shore and of the very<br>shore sufficient for the biggest MoS ships?                                                    | 10-12 meters               |
|   |                                  |                                                                                                                                              | Non-operational<br>time                                       | How much time a year is the terminal out of function<br>for bad weather?                                                                                  | from 10 to 2 days          |
|   |                                  | MINIMISE<br>WAITING<br>TIMES FOR<br>SERVICES<br>PROVISION<br>TO MOS<br>VESSELS<br>WITHIN PORT<br>(MOORING,<br>TUGGING,<br>PILOTAGE,<br>WASTE | MoS service as<br>priority                                    | Is the MoS service marked and treated as a priority in<br>the port/terminal?                                                                              | No                         |
|   |                                  |                                                                                                                                              | Pilotage<br>Exemption<br>Certificate for<br>regular MoS ships | Is there a liability exemption for the pilots on MoS<br>ships that regularly access the port?                                                             | No                         |
|   |                                  |                                                                                                                                              | Tug Obligation for<br>regular MoS<br>ships?                   | Is there an exemption of tug usage for MoS ships that<br>regularly access the port?                                                                       | No                         |
|   |                                  |                                                                                                                                              | Response time                                                 | PILOT - Time required: from the request to reaction?                                                                                                      | No answer                  |
|   |                                  |                                                                                                                                              |                                                               | Needed hours for inspection authorities (veterinary,<br>phitosanitary, etc.)                                                                              | No answer                  |

|   |                                        |                                                                                                                         |                                                                                                                                                   |                                                                                                   |                  |
|---|----------------------------------------|-------------------------------------------------------------------------------------------------------------------------|---------------------------------------------------------------------------------------------------------------------------------------------------|---------------------------------------------------------------------------------------------------|------------------|
|   |                                        | COLLECTION)                                                                                                             | Coordination between service operator and MoS terminal                                                                                            | How would you assess the cooperation between the terminal and an agent?                           | not satisfactory |
|   |                                        |                                                                                                                         |                                                                                                                                                   | How would you assess the cooperation between the terminal and a ship?                             | good             |
| 4 | SHIPPING OPERATIONS                    | REGULAR, RELIABLE AND CONTINUOUS SHIPPING SERVICES                                                                      | Service frequency and capacity                                                                                                                    | Are the frequencies and a capacity satisfactory?                                                  | No answer        |
|   |                                        |                                                                                                                         | Vessel departure / arrival times predetermined and advertised                                                                                     | Are the arrival/departure tables announced?                                                       | No answer        |
|   |                                        |                                                                                                                         | No interruption allowed throughout the year                                                                                                       | Are there deviations from the tables?                                                             | No answer        |
|   |                                        | RELIABLE SHIPPING VESSELS                                                                                               | Vessel compliance with all IMO safety / security / reliability regulations                                                                        | What is the number of detention of MoS ships regarding PSC inspection in the period of last year? | No answer        |
|   |                                        |                                                                                                                         | Bow-thruster availability                                                                                                                         | Do they have adequate bow-thrusters?                                                              | No answer        |
|   |                                        | SAFETY OF PERSONNEL AND CARGO IN SHIPPING                                                                               | Compliance with Directives on means of securing cargo                                                                                             | Is there lack of compliance with safety regulations observed?                                     | No answer        |
|   |                                        |                                                                                                                         |                                                                                                                                                   |                                                                                                   |                  |
|   |                                        |                                                                                                                         |                                                                                                                                                   |                                                                                                   |                  |
| 5 | INFORMATION EXCHANGE AND DOCUMENTATION | EXCHANGE OF REAL TIME INFORMATION BETWEEN MOS SERVICE STAKEHOLDERS REGARDING DOCUMENTATION OF THE PROVIDED MOS SERVICES | AVAILABILITY OF SUITABLE ICT SYSTEM FOR REMOTE REAL TIME INFORMATION EXCHANGE (ELECTRONIC DOCUMENT TRANSFER) BETWEEN ALL MOS SERVICE STAKEHOLDERS | Is the documentation exchanged electronically?                                                    | no               |
|   |                                        |                                                                                                                         | Coordination between ports of origin and destination                                                                                              | Is there an exchange of documents between starting points and destination?                        | no               |
|   |                                        |                                                                                                                         | Communication of cargo documentation well in advance of ship arrival in port                                                                      | Is the documentation exchanged electronically?                                                    |                  |
|   |                                        |                                                                                                                         |                                                                                                                                                   | How do you assess electronic exchange of documents?                                               | not satisfactory |
|   |                                        |                                                                                                                         | Priority assignment to MoS services for procedures and dispatch                                                                                   | Is there a priority for MoS services?                                                             | No               |
|   |                                        | FAST CLEARING OF MOS SUBJECTS (TRANSPORT MEANS, CARGO AND PASSENGERS) FROM DOCUMENT AND PHYSICAL INSPECTIONS            | Identify regular MoS customers and certify them in advance so that they can be easily cleared (create relevant data bases)                        | Is there a regulation for acceleration and simplification of regular MoS procedures?              | no               |
|   |                                        |                                                                                                                         |                                                                                                                                                   | How do you assess the level of this service?                                                      | No answer        |
|   |                                        |                                                                                                                         |                                                                                                                                                   |                                                                                                   |                  |

|    |                                                                                     |                                                                                |                                                                               |                                                                                                                                  |                  |
|----|-------------------------------------------------------------------------------------|--------------------------------------------------------------------------------|-------------------------------------------------------------------------------|----------------------------------------------------------------------------------------------------------------------------------|------------------|
|    |                                                                                     | STREAMLINE<br>D<br>DOCUMENT<br>AND<br>PHYSICAL<br>INSPECTIONS<br>BY<br>CUSTOMS | Priority assigned<br>to MoS cargo<br>(special queue<br>line)                  | Is there a regulation for acceleration and simplification<br>of regular MoS services?                                            | no               |
|    |                                                                                     |                                                                                |                                                                               | How do you assess the level of this service?                                                                                     | No answer        |
|    |                                                                                     |                                                                                |                                                                               | Is there a special infrastructure (road, parking space,<br>inspection point, etc.) for MoS services?                             | No answer        |
|    |                                                                                     |                                                                                |                                                                               | Do you find it useful?                                                                                                           | No answer        |
|    |                                                                                     | COORDINATE<br>D CUSTOMS<br>AND<br>SAFETY<br>INSPECTIONS                        | Coordination of<br>routine<br>inspections<br>between different<br>authorities | Is there coordination between all inspection services in<br>order to accelerate necessary inspections?                           | No answer        |
|    |                                                                                     |                                                                                |                                                                               | Is it at a satisfactory level?                                                                                                   | No answer        |
| 6. | MoS SERVICE<br>PROMOTION<br>AND<br>IMPLEMENTATIO<br>N FORM ORIGIN<br>TO DESTINATION | PROMOTION<br>AL ACTIVITIES                                                     | Promotional<br>centres                                                        | Is the promotion conducted by the operators or the<br>regional body?                                                             | operators        |
|    |                                                                                     |                                                                                |                                                                               | Is there a national/ regional body in charge of<br>promotion? (IPC, SPC)                                                         | natioal          |
|    |                                                                                     |                                                                                |                                                                               | How do you assess this system?                                                                                                   | not satisfactory |
|    |                                                                                     |                                                                                | Promotion system                                                              | How do you assess the level of promotion?                                                                                        | not satisfactory |
|    |                                                                                     |                                                                                |                                                                               | How do you assess the importance of promotion for<br>insurance of successful services?                                           | important        |
|    |                                                                                     |                                                                                |                                                                               | Is the promotion conducted individually in the<br>countries or for the complete route/service?                                   | No answer        |
|    |                                                                                     | SUSTAINABLE<br>AND<br>SYSTEMATIC<br>BOTTLENECK<br>MANAGEMA<br>NT               |                                                                               | Is there a systematic identification of bottlenecks?                                                                             | no               |
|    |                                                                                     |                                                                                |                                                                               | Are all responsible bodies in the countries that use the<br>service included? (Ministry, port authorities, Police,<br>Customs..) | no               |
|    |                                                                                     |                                                                                |                                                                               | Are all subjects in the transport chain called for the<br>identification?                                                        | no               |
|    |                                                                                     |                                                                                |                                                                               | How do you assess the success of this model?                                                                                     | not satisfactory |
|    |                                                                                     | ICT SUPPORT                                                                    | Route plan                                                                    | Is there a service database on the whole route?                                                                                  | No               |
|    |                                                                                     |                                                                                |                                                                               | Is the update of the base satisfactory?                                                                                          | No               |
|    |                                                                                     |                                                                                | Promotion of<br>intermodality                                                 | How do you assess usefulness of this tool?                                                                                       | No answer        |
|    |                                                                                     |                                                                                | Electronic data<br>interchange                                                | Is the exchange of documents on the whole<br>route/service including the road assured?                                           | No               |
|    |                                                                                     |                                                                                |                                                                               | How do you assess usefulness of this service?                                                                                    | important        |
|    |                                                                                     | QUALITY<br>MANAGEME<br>NT                                                      |                                                                               | Is there a system for assessment of the level of service<br>quality from the starting point to destination?                      | No               |
|    |                                                                                     |                                                                                |                                                                               |                                                                                                                                  |                  |
| 7. | ECOLOGICAL<br>ASPECT                                                                | GENERAL                                                                        |                                                                               | Are there complaints for environmental pollution<br>related to MoS services?                                                     | No               |
|    |                                                                                     |                                                                                |                                                                               | Is the functioning of MoS service resulting in significant<br>environmental pollution (air, sea, land)?                          | No               |
|    |                                                                                     | PORT                                                                           | WASTE<br>MANAGEMENT                                                           | Is there a system for waste, sewage and bilge disposal<br>in the harbour?                                                        | yes              |

### Bottlenecks and missing links

#### Infrastructure:

- roads for accessing the terminal and leaving the terminal are not clearly marked
- access road is not at a satisfactory safety level
- no highway
- the road connection to port passing through the urban and inhabited area
- no railway infrastructure
- ro-ro ramp existing but but not in the adequate state and capacity
- terminal roads are not adequately marked with traffic signalization
- not sufficient number of tracks on terminal roads
- identification of roads from parking area is not clear on terminal
- insufficient capacity on terminal parking area
- non-existence of areas adequately arranged, with different areas for waiting and pre-embarkation and the interior traffic
- Non-existence of auxiliary services area close to the vehicles

Organisational:

- no computerized management system in the port (system that enables electronic exchange of documents between the drivers and terminal )
- no data bases of vehicles / drivers created in parallel with application of a risk management system
- VTMISS not fully implemented
- no electronic exchange of documents
- need for additional procedures in order to accelerate and simplify procedures and work on terminal
- need for additional procedures in order to accelerate and simplify customs procedures

Additional services:

- non-existence of joint systematic promotion
- non-existence of systematic „bottleneck exercise“
- non-existence of IT route planner
- partial Quality Management implemented
