# Supplementary material
Source: MDPI journal article supplement (https://www.mdpi.com/2071-1050/11/23/6827)
Supplement: s1 [file s1]

Archive with 3 entries (3 files):
- Supplement 1 - Questionnaire (82 criteria).pdf
- Supplement 2 - The status of criteria in 9 ports.pdf
- Supplement 3 - Criteria (31) and weights.pdf
